# Supplementary material for: Engineered Cas12a-Plus nuclease enables gene editing with enhanced activity and specificity
Source: PubMed Central journal article supplement (PMC9040236; doi:10.1186/s12915-022-01296-1), 2022-04-25
Supplement: 12915_2022_1296_MOESM1_ESM.pdf [file 12915_2022_1296_MOESM1_ESM.pdf]

# Supplementary Figures

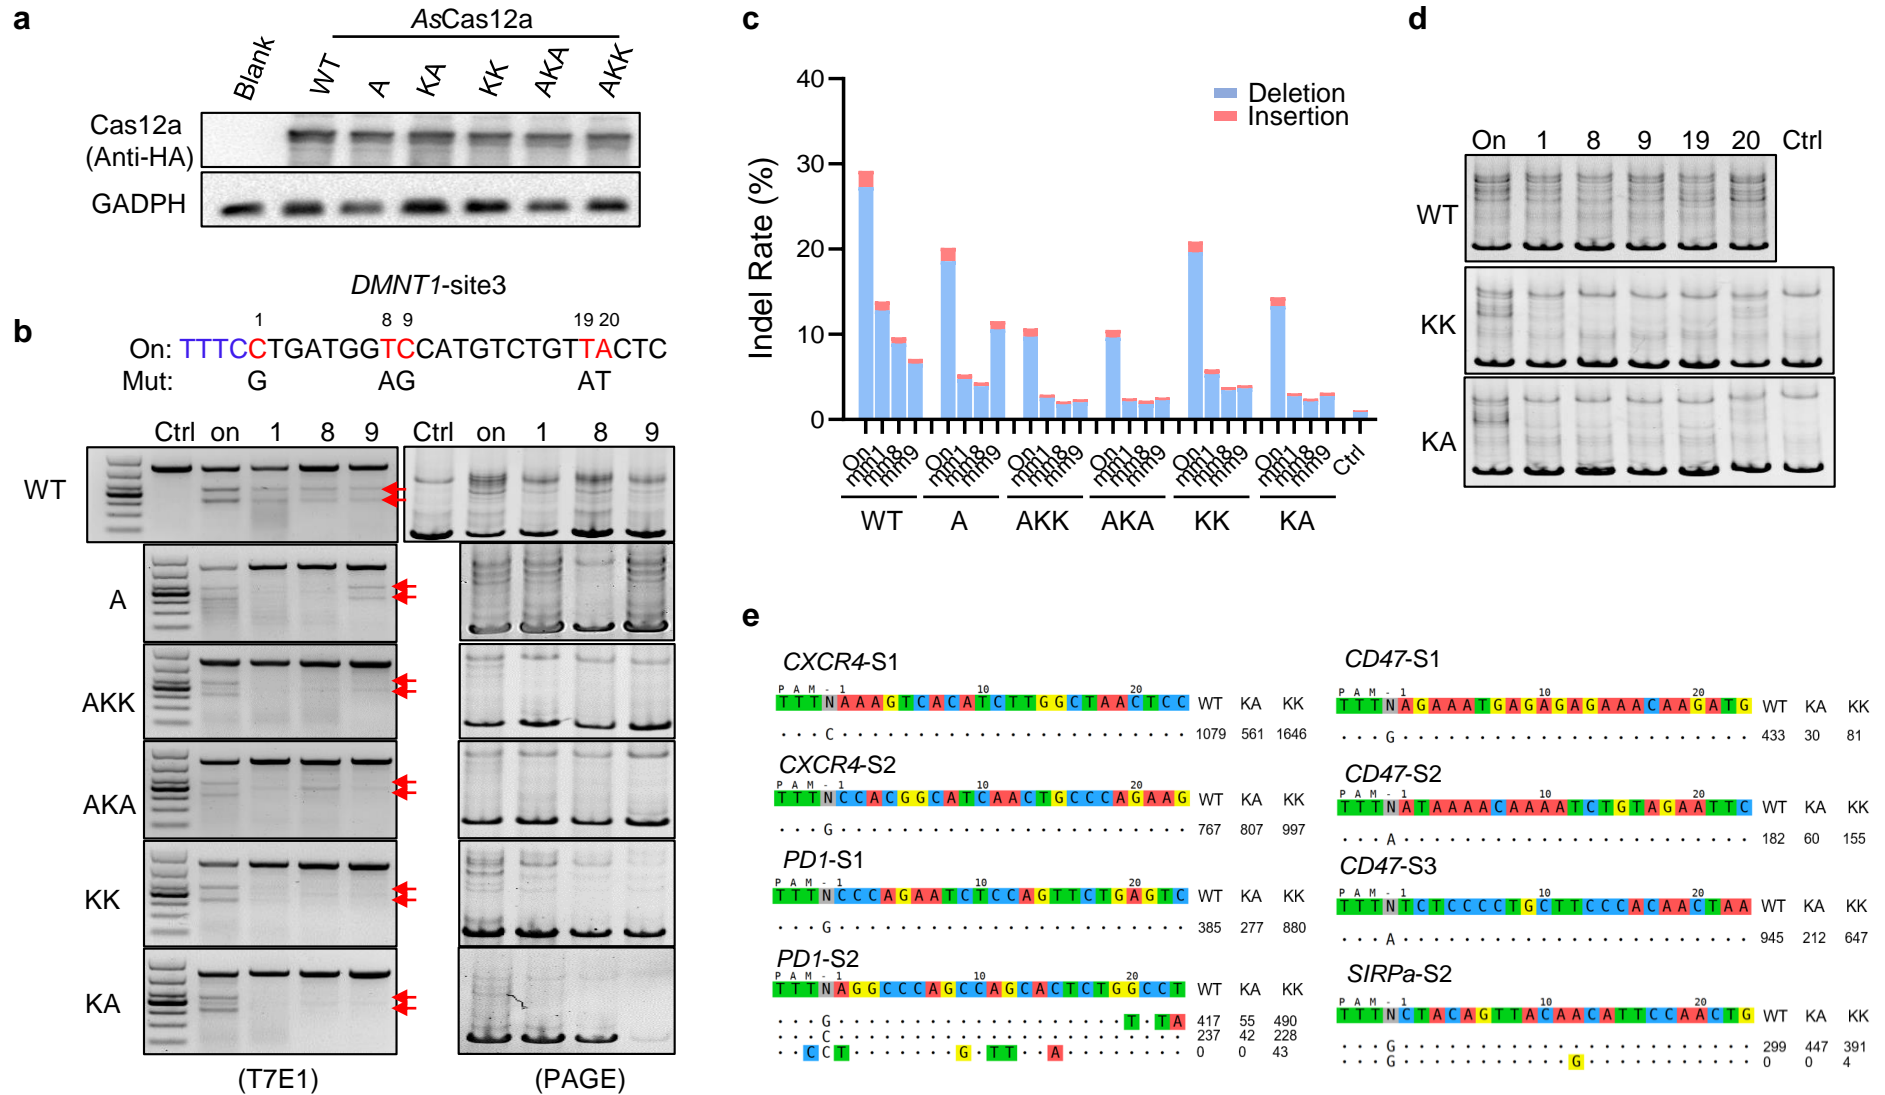

**Figure S1.** Construction of AsCas12a variants and assessment of their specificity

**Figure S1. Construction of AsCas12a variants and assessment of their specificity.** **a** Western blot showing the expression levels of AsCas12a-WT and AsCas12a variants. Blank, HEK293T cells without transfection. **b** T7E1 and PAGE gel assays assessing the editing activity of the AsCas12a variants at *DNMT1*-site3 with perfectly matched sgRNA or mismatched sgRNAs. PAM: highlighted in blue. On: on-target sgRNA. 1, 8, 9: the mismatched sgRNA with mutation sites in sgRNA that highlighted in red. Red arrows, cleavage products. **c** Deep-seq showing the editing efficiency of the AsCas12a variants at *DNMT1*-site3 with perfectly matched sgRNA or mismatched sgRNAs. **d** PAGE gel assay showing the editing activity of the AsCas12a-KK and AsCas12a-KA variants targeting *DNMT1*-site3 with sgRNAs with mismatched locations at 1, 8, 9, 19, and 20. **e** Tag-seq-based comparative analyses of wild-type AsCas12a (WT), AsCas12a variant KA (KA), and AsCas12a variant KK (KK) with seventeen sgRNAs targeting nine genes (also see Fig. 1c). HEK293T cells were co-transfected with the plasmids expressing AsCas12a variants and a pooled seventeen sgRNAs targeting nine genes. Genomic DNA was harvested after three days post-transfection for libraries construction and Tag-seq analysis. Read counts represented a measure of cleavage frequency at a given site, mismatched positions within the spacer or PAM are highlighted in color.

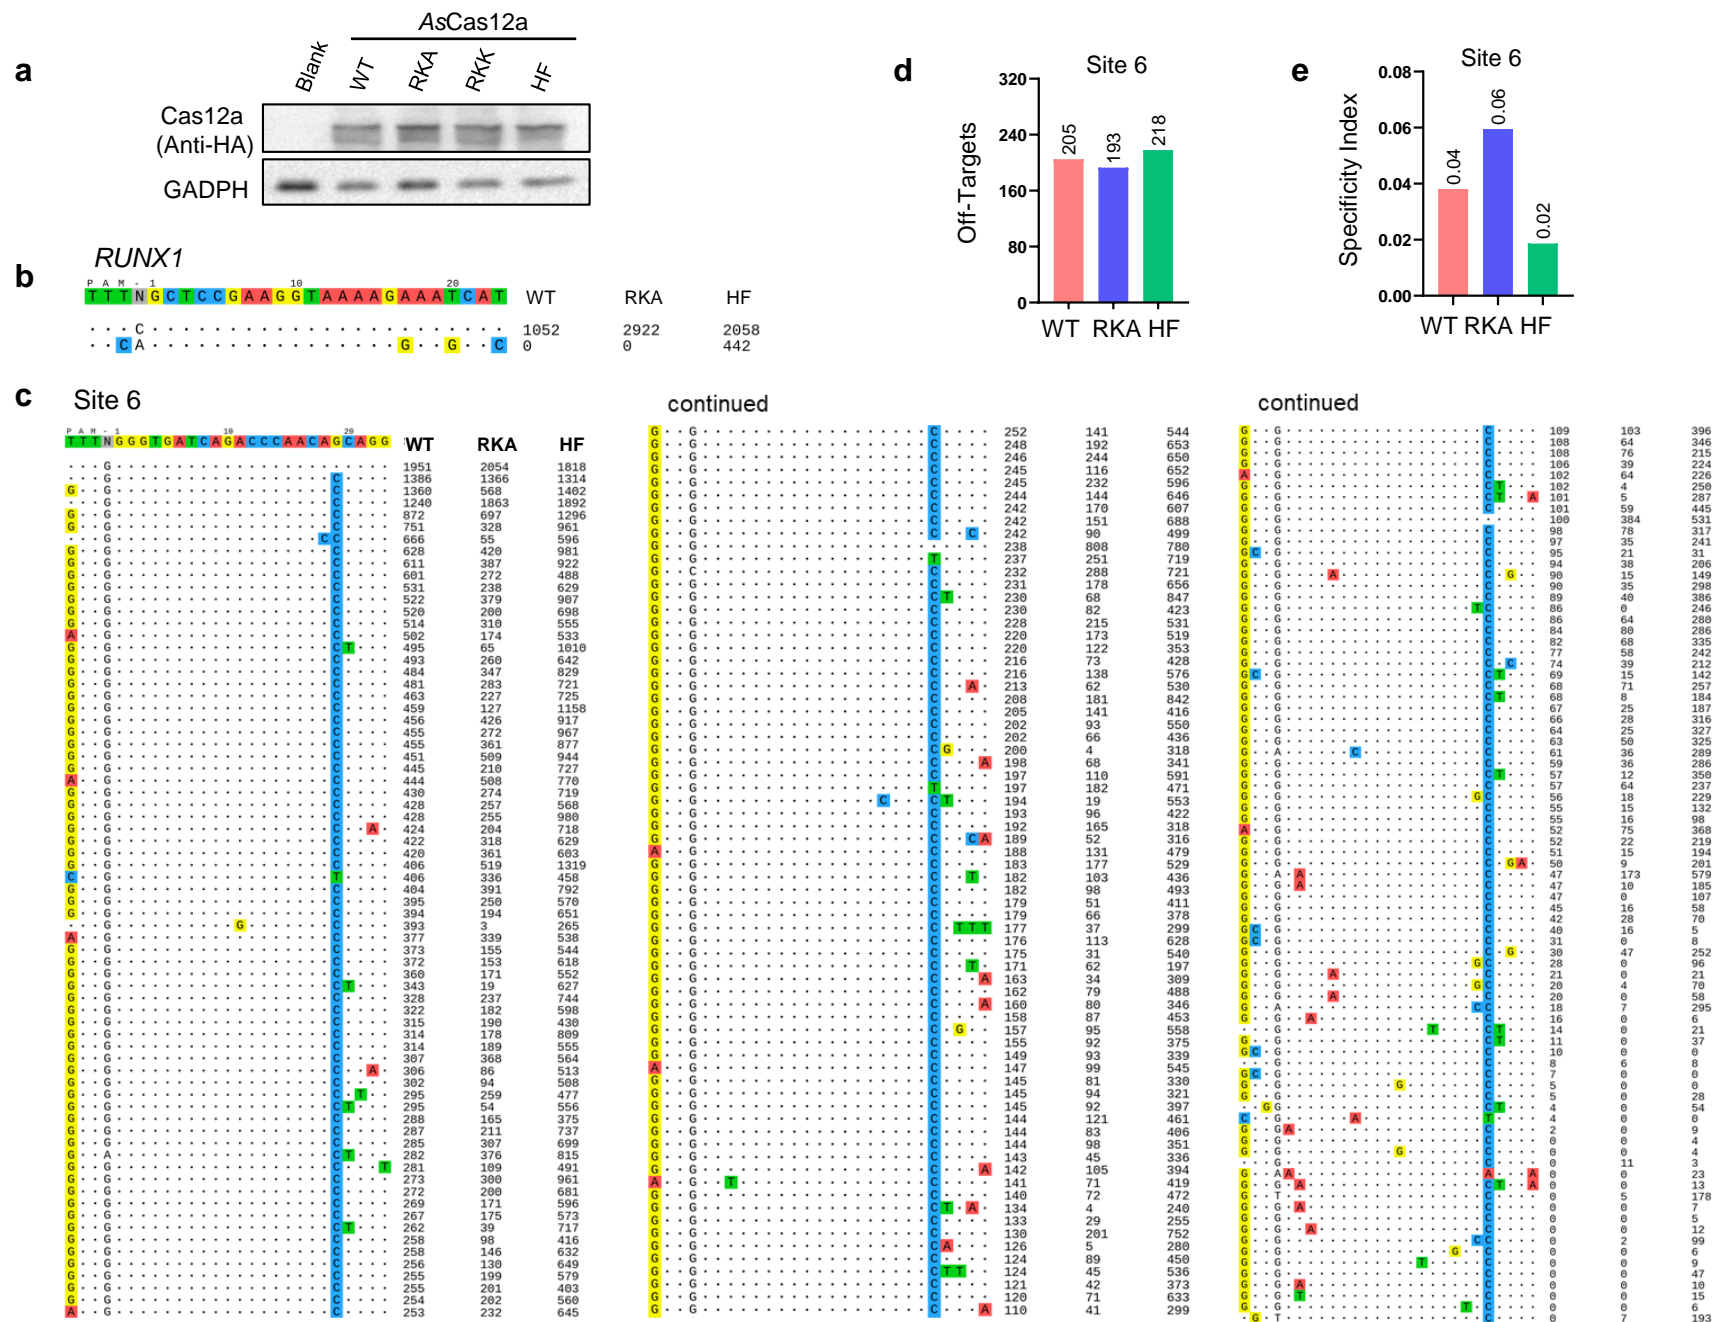

**Figure S2. Specificity assessment of AsCas12a-RKA.** **a** Western blot showing the expression levels of AsCas12a-WT and high active AsCas12a variants. **b** On-target and off-target cleavage sites of wild-type AsCas12a (WT), AsCas12a variant RKA (RKA), and enAsCas12a-HF (HF, the high-specificity version of the enAsCas12a) targeting *RUNX1* as determined by Tag-seq. **c** On-target and off-target cleavage sites of WT, RKA, and HF targeting Site 6 as determined by Tag-seq. **d** Total number of off-target sites detected at Site 6. **e** Specificity Index (value was calculated by the ratio of total on-target reads to the on-target reads plus the off-target reads).

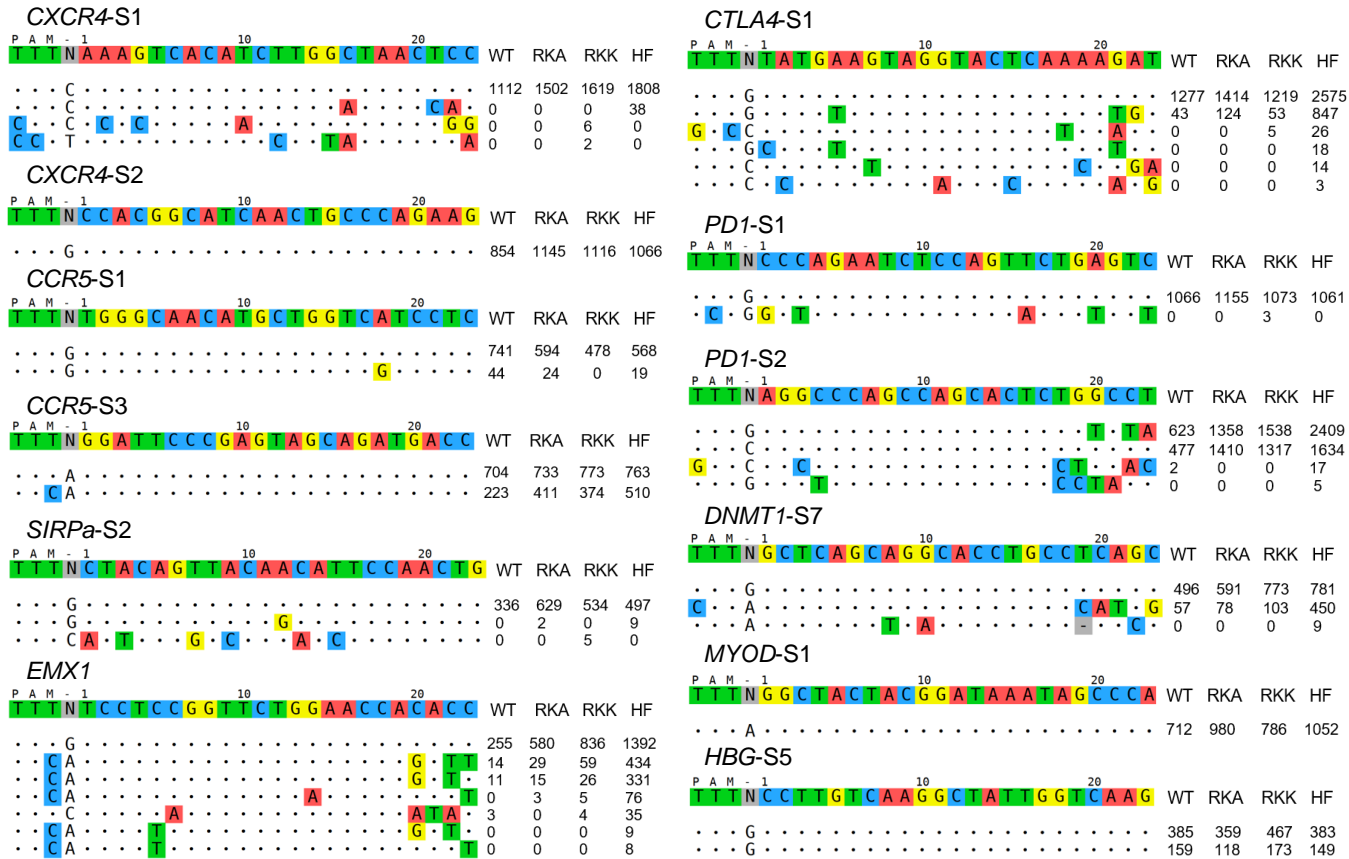

**Figure S3.** Specificity comparison of AsCas12a-WT, -RKA, -RKK, and -HF by Tag-seq

**Figure S3. Specificity comparison of *AsCas12a*-WT, -RKA, -RKK, and -HF by Tag-seq.** HEK293T cells were co-transfected with the plasmids expressing *AsCas12a* variants and a pooled twenty-two sgRNAs targeting twelve genes. Genomic DNA was harvested after three days post-transfection for libraries construction and Tag-seq analysis. Read counts represented a measure of cleavage frequency at a given site, mismatched positions within the spacer or PAM are highlighted in color. (also see Fig. 2b)

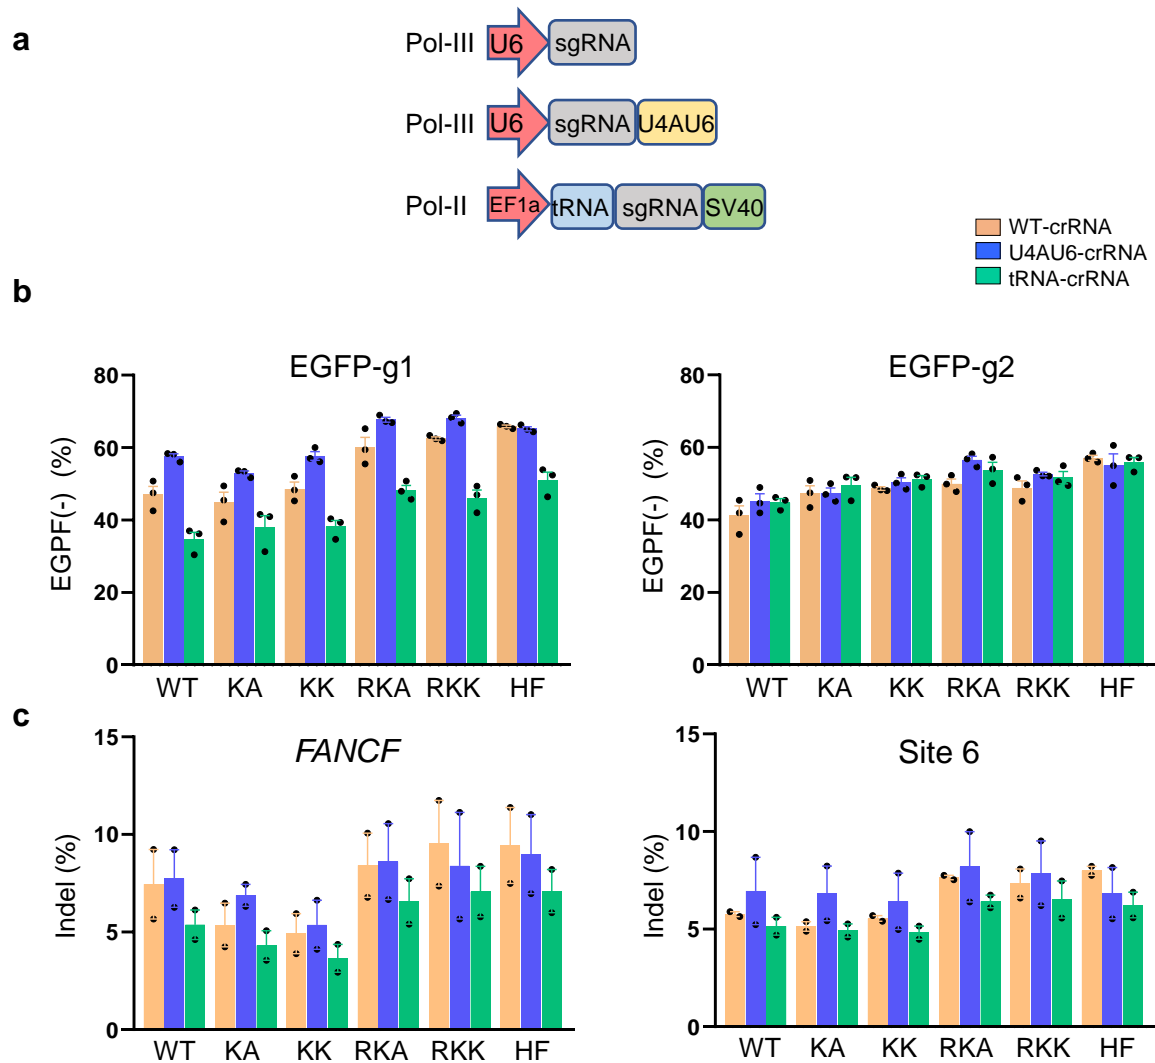

**Figure S4.** The Engineering of crRNA to improve efficiency

**Figure S4. The engineering of crRNA to improve efficiency.** **a** Schematic of sgRNA engineering. **b** Flow cytometry detected the efficiency of disruption EGFP by AsCas12a-WT and AsCas12a variant using the engineered sgRNAs. EGFP-g1/g2, sgRNA1/sgRNA2 targeting *EGFP*. Mean values are presented with SEM, n=3 independent experiments. **c** Deep-seq showed the editing efficiency of AsCas12a-WT and AsCas12a variants targeting human endogenous *FANCF* genes and Site 6 using engineered sgRNAs. n=2 independent experiments. Indel was revealed by Deep-seq.



**a**Wild-type BRAF: TTTGGTCTAGCTACAGT**T**GAAATCTCGATGG (HEK293T Cell)BRAF-V600E: TTTGGTCTAGCTACAG**A**GAAATCTCGATGG (A375 Cell)
 WT-sgRNA { Cas9: TAGCTACAG**T**GAAATCTCGATGG  
 Cas12a: TTTGGTCTAGCTACAG**T**GAAATCTCGA

 Mut-sgRNA { Cas9: TAGCTACAG**A**GAAATCTCGATGG  
 Cas12a: TTTGGTCTAGCTACAG**A**GAAATCTCGA
**b**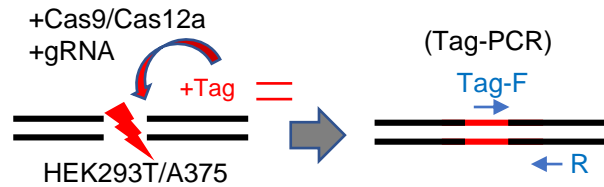**c**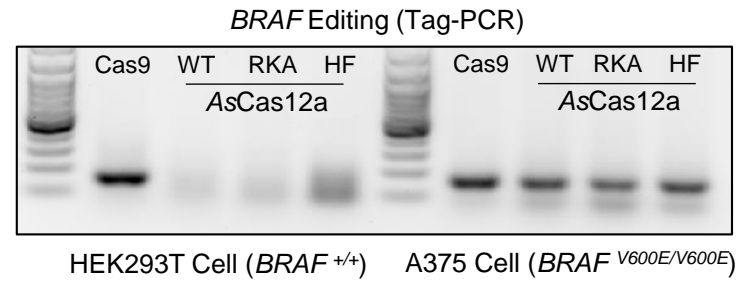**Figure S5.** Editing of BRAF<sup>V600E</sup> with *Sp*Cas9 and *As*Cas12a nucleases

**Figure S5. Editing of BRAF<sup>V600E</sup> with SpCas9 and Cas12a nucleases.** **a** Illustration of the SpCas9/Cas12a sgRNAs targeting the wild-type or mutant *BRAF*. SpCas9 PAM: highlighted in green. Cas12a PAM: highlighted in blue. Mutated site: highlighted in red. **b** Schematic of the Tag-PCR. Modified oligonucleotide DNA (Termed Tag) can be integrated into genomic DNA by Cas9/Cas12a nucleases. The editing efficiency can be roughly determined by PCR using the Tag specific primer and a genomic site-specific primer indicated with the blue arrows. **c** Tag-PCR showed the editing efficiency for the wild-type and mutant *BRAF* in HEK293T and A375 cell line with Cas9/Cas12a mut-sgRNA.

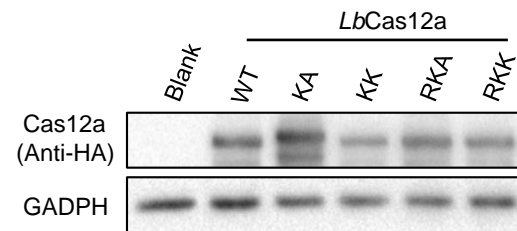

**Figure S6.** Detection the expression levels of *LbCas12a* nucleases

**Figure S6. Detection the expression levels of *LbCas12a* nucleases.** Western blot showing the expression levels of *LbCas12a*-WT and *LbCas12a*-variants. Blank, HEK293T without transfection

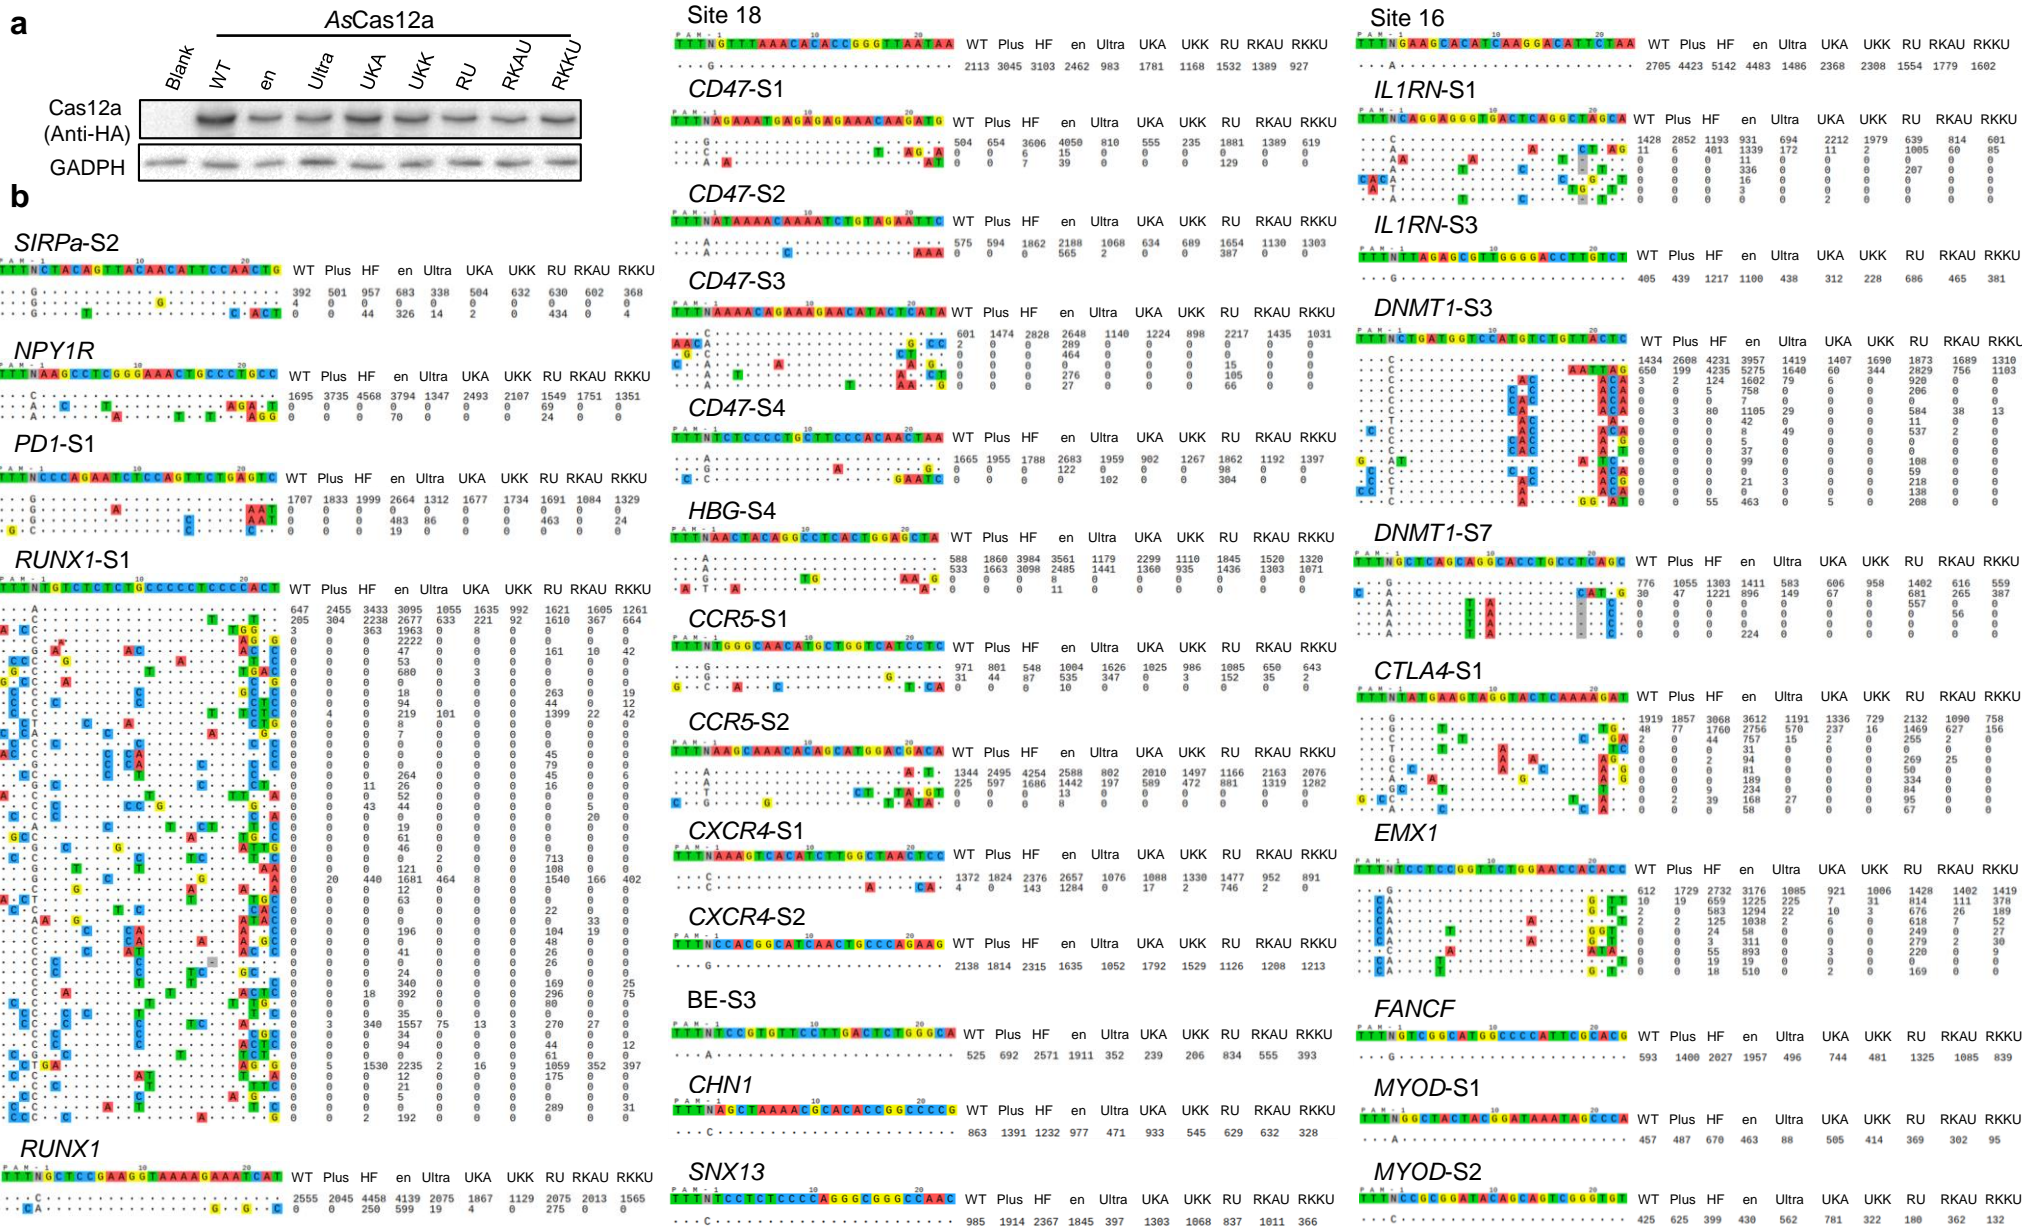

**Figure S7.** Specificity assessment of AsCas12a-WT, -Plus, -HF, enAsCas12a, -ultra, -UKA, -UKK, -RU, -RKAU, and -RKKU by Tag-seq

**Figure S7. Specificity assessment of AsCas12a-WT, -Plus, -HF, enAsCas12a, -ultra, -UKA, -UKK, -RU, -RKAU, and -RKKU by Tag-seq.** **a** Western blot showing the expression levels of AsCas12a variants. Blank, HEK293T without transfection. **b** Specificity assessment of AsCas12a variants by Tag-seq. HEK293T cells were co-transfected with the plasmids expressing AsCas12a variants and a pooled twenty-eight sgRNAs targeting nineteen genes. Genomic DNA was harvested after three days post-transfection for libraries construction and Tag-seq analysis. Read counts represented a measure of cleavage frequency at a given site, mismatched positions within the spacer or PAM are highlighted in color. RKA=Plus, en=enAsCas12a, UKA=Ultra+KA, UKK=Ultra+KK, RU=high active mutation E174R+Ultra, RKAU=RKA+Ultra, RKKU=RKK+Ultra.

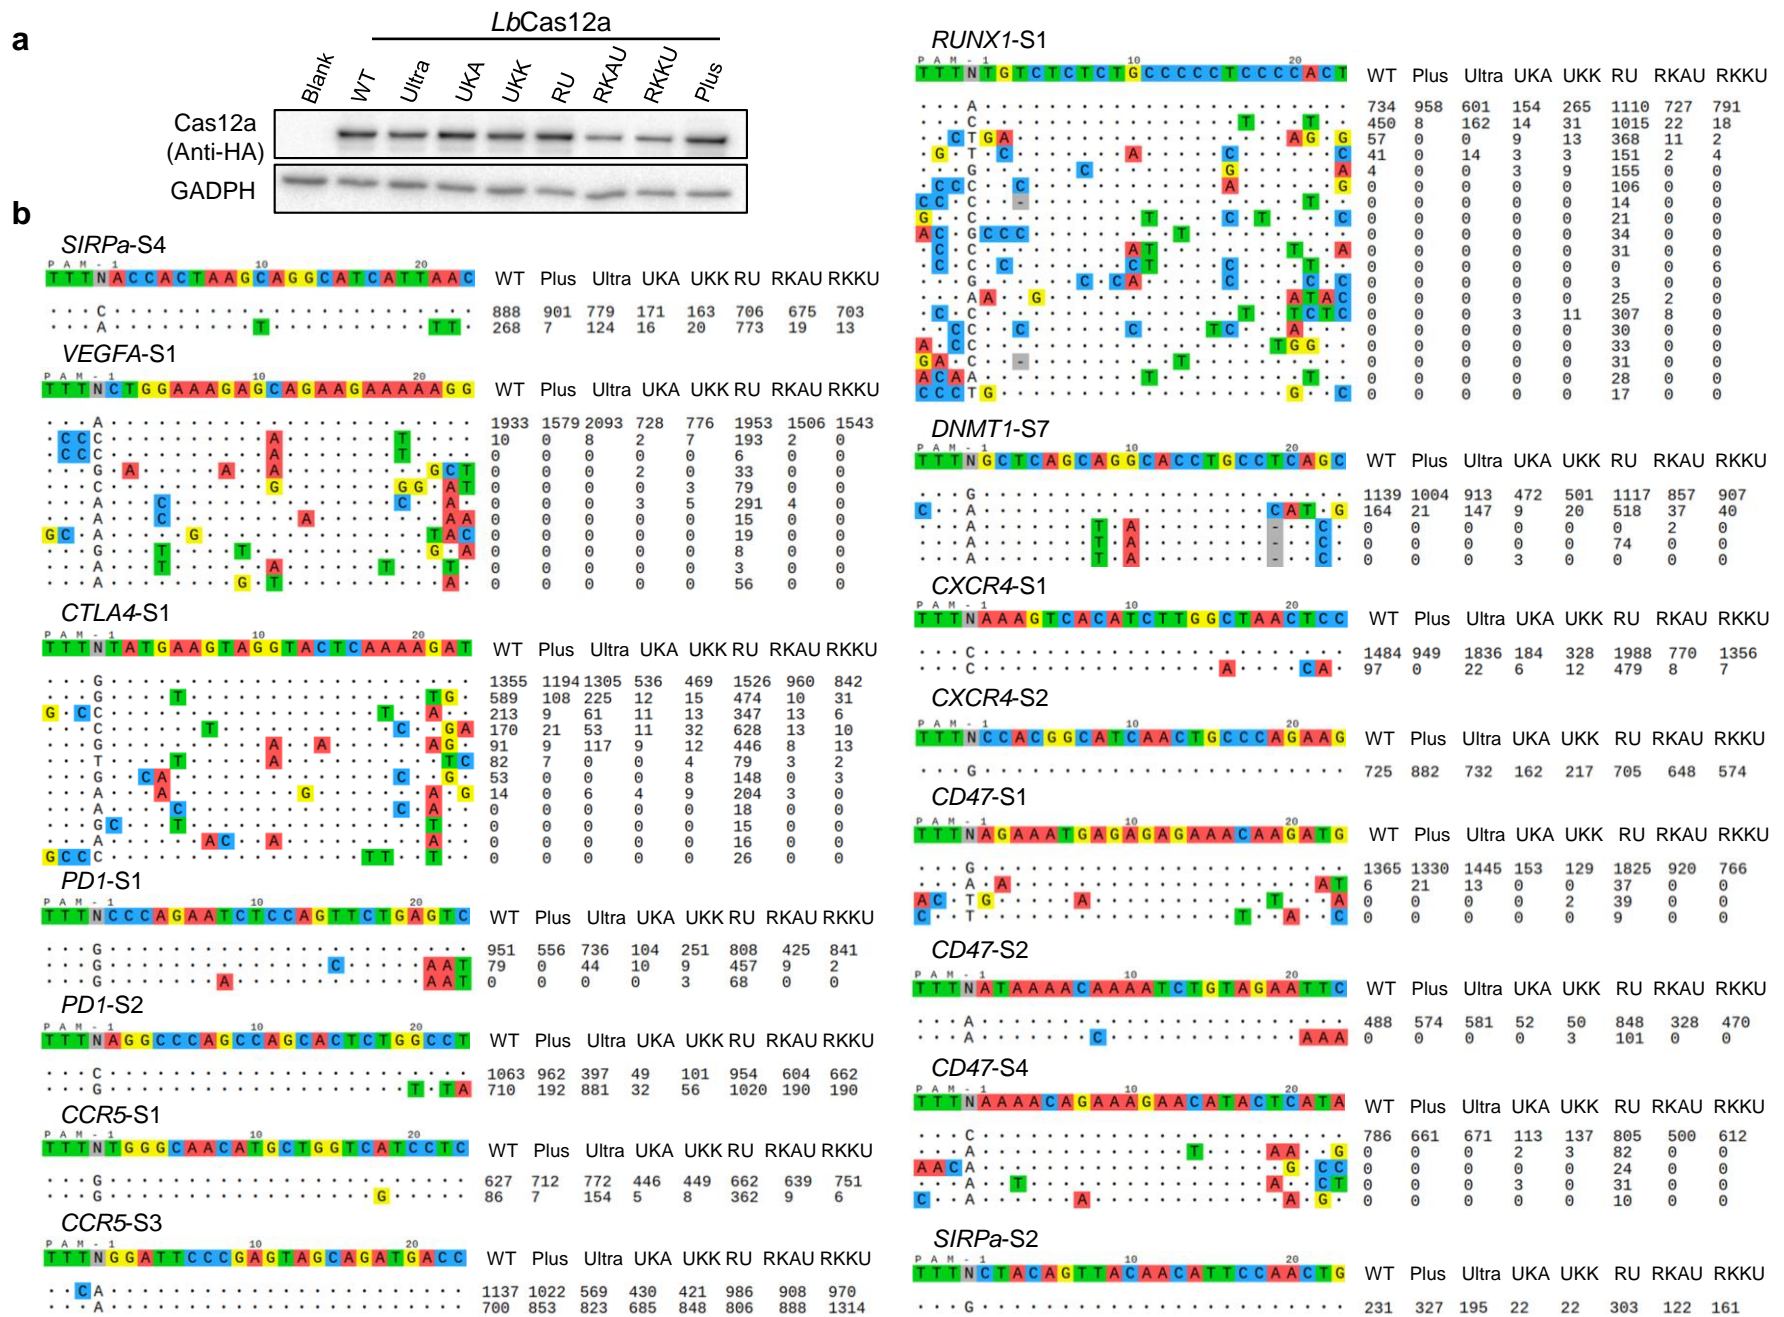

**Figure S8.** Specificity assessment of *LbCas12a*-WT, -Plus, -ultra, -UKA, -UKK, -RU, -RKAU, -RKKU by Tag-seq

**Figure S8. Specificity assessment of *LbCas12a*-WT, -Plus, -ultra, -UKA, -UKK, -RU, -RKAU, and -RKKU by Tag-seq.** **a** Western blot showing the expression levels of *LbCas12a* variants. Blank, HEK293T without transfection. **b** Specificity assessment of *LbCas12a* variants by Tag-seq. HEK293T cells were co-transfected with the plasmids expressing *LbCas12a* variants and a pooled fifteen sgRNAs targeting nine genes. Genomic DNA was harvested after three days post-transfection for libraries construction and Tag-seq analyses. Read counts represented a measure of cleavage frequency at a given site, mismatched positions within the spacer or PAM are highlighted in color. RKA=Plus, UKA=Ultra+KA, UKK=Ultra+KK, RU=high active mutation D156R+Ultra, RKAU=RKA+Ultra, RKKU=RKK+Ultra.



### AsCas12a-mNeonGreen-sgRNA1

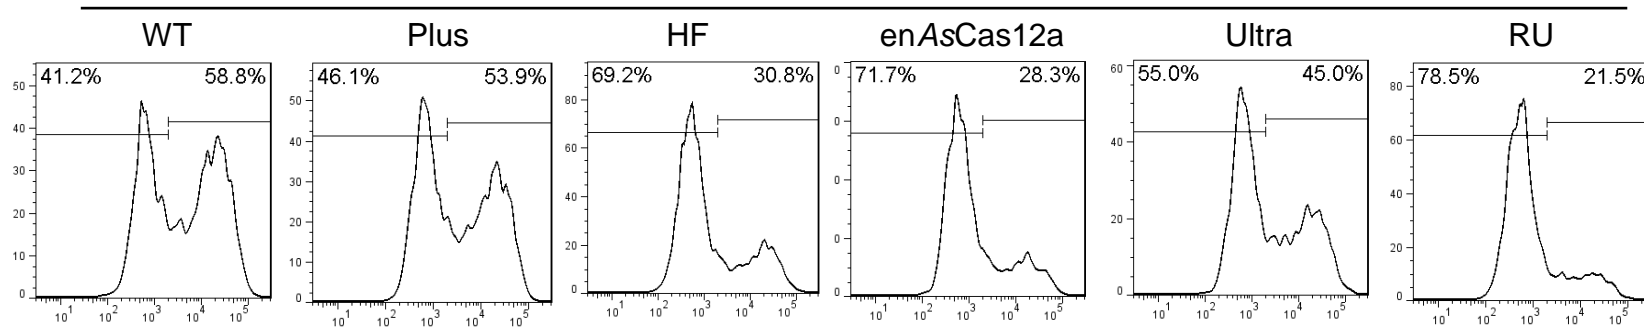

### AsCas12a-mNeonGreen-sgRNA2

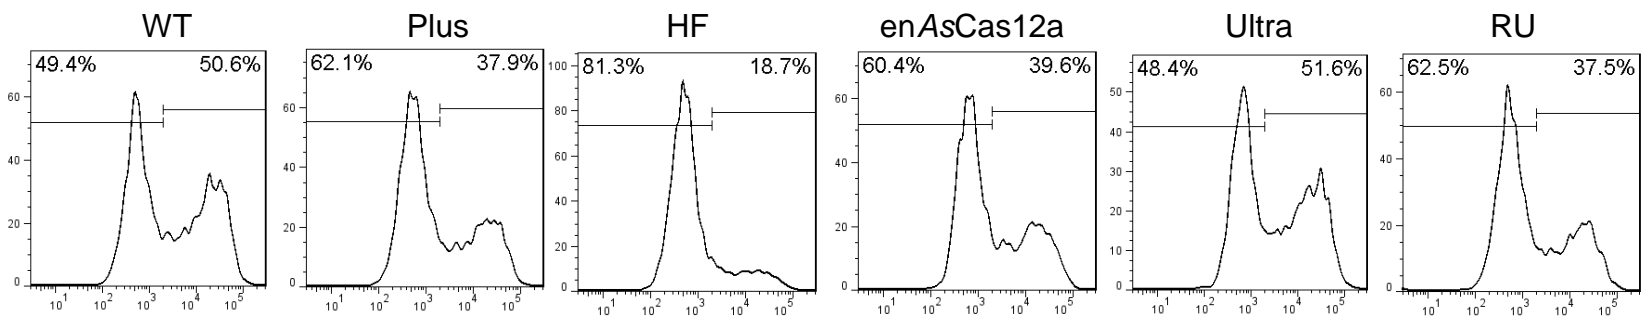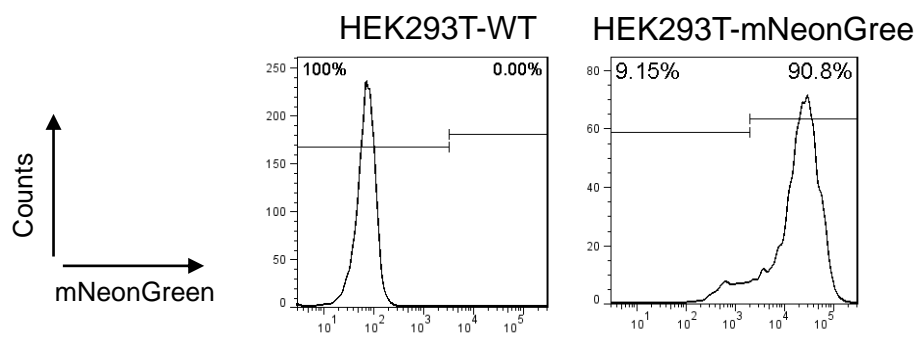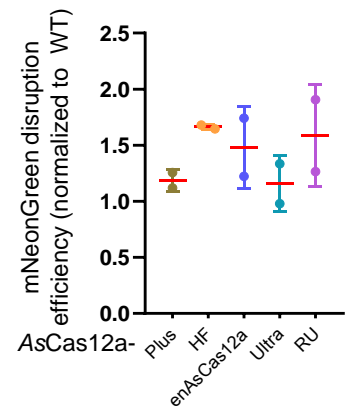

**Figure S9.** Editing efficiency analyses of AsCas12a-WT, -Plus, -HF, enAsCas12a, -ultra, -UKA, -UKK, and -RU

**Figure S9. Editing efficiency analyses of AsCas12a-WT, -Plus, -HF, enAsCas12a, -ultra, -UKA, -UKK, and -RU.** Flow cytometry detected the efficiency of disruption mNeonGreen by AsCas12a-WT and AsCas12a variants in HEK293T Knock-in mNeonGreen-PEST cell line. mNeonGreen-sgRNA1/2, AsCas12a sgRNA targeting mNeonGreen site 1/2. n=2 independent experiments.

## *LbCas12a*-mNeonGreen-sgRNA1

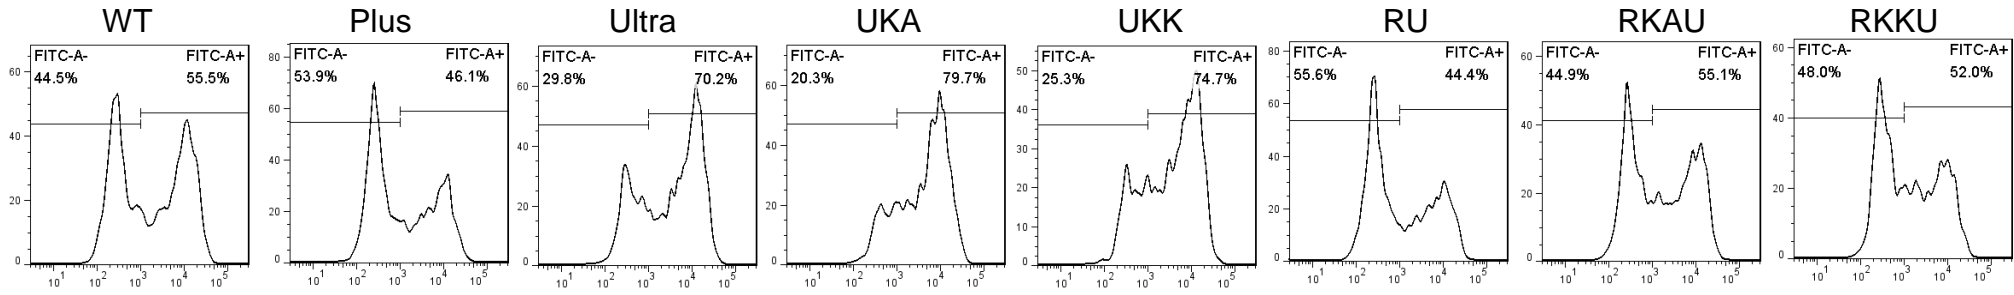

## *LbCas12a*-mNeonGreen-sgRNA2

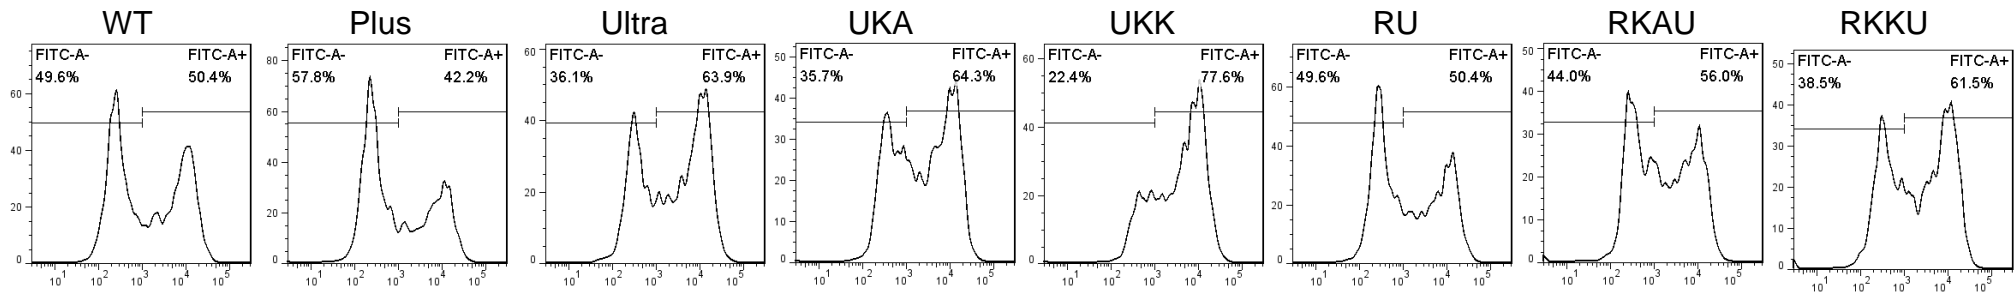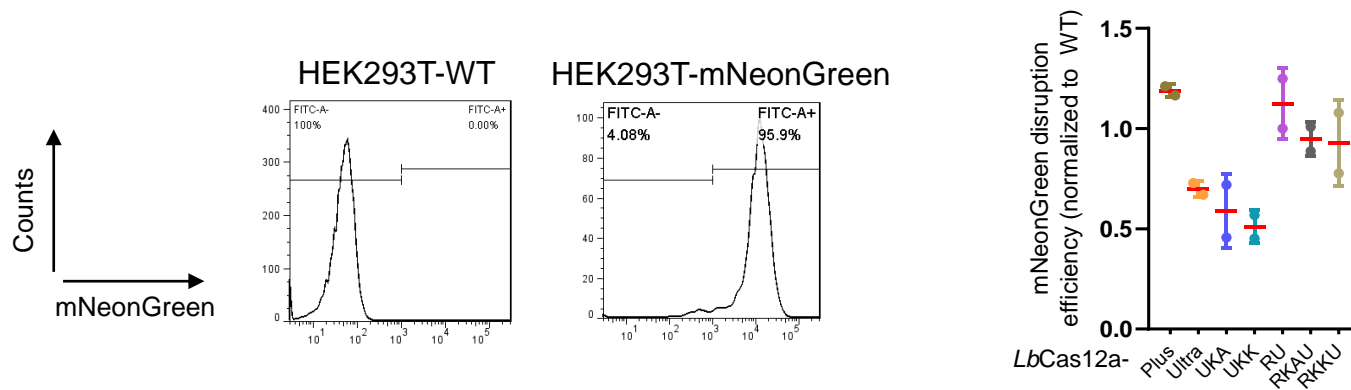

**Figure S10.** Editing efficiency analyses of *LbCas12a*-WT, -Plus, -ultra, -UKA, -UKK, -RU, -RKAU, and -RKKU

**Figure S10. Editing efficiency analyses of *LbCas12a*-WT, -Plus, -ultra, -UKA, -UKK, -RU, -RKAU, and -RKKU.** Flow cytometry detected the efficiency of disruption mNeonGreen by *LbCas12a*-WT and *AsCas12a* variants in HEK293T Knock-in mNeonGreen-PEST cell line. mNeonGreen-sgRNA1/2, *LbCas12a* sgRNA targeting mNeonGreen site 1/2. n=2 independent experiments.
