# Supplementary material for: Engineered Cas12a-Plus nuclease enables gene editing with enhanced activity and specificity
Source: PubMed Central journal article supplement (PMC9040236; doi:10.1186/s12915-022-01296-1), 2022-04-25
Supplement: 12915_2022_1296_MOESM2_ESM.pdf [file 12915_2022_1296_MOESM2_ESM.pdf]

## Supplementary Information

### Supplementary Tables

**Table S1.** The engineering of the CRISPR-AsCas12a/LbCas12a systems

| Cas12a type                                        | Engineering          | Efficiency | Specificity  | Note                                                                                                                                                                                               | Targeting Ranges   |
|----------------------------------------------------|----------------------|------------|--------------|----------------------------------------------------------------------------------------------------------------------------------------------------------------------------------------------------|--------------------|
| AsCas12a;<br><i>LbCas12a</i>                       | Cas-protein          | ↓          | ↑            | (2017) <i>AsCas12a</i> -RR/A (S542R, K607R/K949A);<br><i>AsCas12a</i> -RVR/A (S542R, K548V, N552R/K949A);<br><i>LbCas12a</i> -RR (G532R, K595R);<br><i>LbCas12a</i> -RVR (G532R, K538V, Y542R)[26] | ↑                  |
| <i>LbCas12a</i>                                    | Cas-protein          | --         | --           | (2018, 2019) <i>LbCas12a</i> -RR(G532R, K595R); -RVR (G532R, K538V, Y542R) (tested in Plant)[41-43]                                                                                                | ↑                  |
| AsCas12a;<br><i>LbCas12a</i>                       | Cas-protein          | --         | ↑            | (2019) Synthetic chimeric Cas12a[44]                                                                                                                                                               | --                 |
| AsCas12a                                           | Cas-protein          | ↑          | ↓            | (2019) en <i>AsCas12a</i> (E174R, S542R, K548R);<br>en <i>AsCas12a</i> -HF1 (N282A, E174R, S542R, K548R)[27]                                                                                       | ↑                  |
| <i>LbCas12a</i>                                    | Cas-protein          | ↑          | ↓            | (2020) <i>LbCas12a</i> -RRVR (G532R, K538V, Y542R, K595R);<br>imp <i>LbCas12a</i> (D156R, G532R, K538V, Y542R, K595R)[45]                                                                          | ↑                  |
| <i>LbCas12a</i>                                    | Cas-protein          | ↑          | Unknown      | (2020) en <i>LbCas12a</i> (D156R, G532R, K538R);<br>tt <i>LbCas12a</i> (D156R), (tested in Plant)[46]<br>(2020) <i>LbCas12a</i> (D156R), (tested in Drosophila)[47]                                | ↑                  |
| d <i>LbCas12a</i>                                  | Cas-protein          | --         | --           | (2020) N256A, N260A, S348A, K514A, K881A, K897A[48]                                                                                                                                                | Unknown            |
| <i>LbCas12a</i>                                    | Cas-protein          | --         | Unknown      | (2020) <i>LbCas12a</i> -RSR (G532R/K538S/Y548R);<br><i>LbCas12a</i> -RAR (G532R/K538A/Y548R)[49]                                                                                                   | ↑                  |
| AsCas12a                                           | Cas-protein          | ↑          | ↓            | (2021) <i>AsCas12a</i> ultra (M537R/F870L)[52]                                                                                                                                                     | ↑                  |
| <i>LbCas12a</i> ;<br>AsCas12a;<br><i>Lb2Cas12a</i> | Cas-protein          | --         | ↑            | (2022) Lb-K538R;<br>As-K548R;<br>Lb2-K548R[53]                                                                                                                                                     | --                 |
| AsCas12a                                           | Cas-protein<br>sgRNA | ↑          | Unknown<br>↓ | (2020) op <i>AsCas12a</i> (E174R, S542R)[50];<br>(2020) open <i>AsCas12a</i> (E174R, S542R, K548R)[51]                                                                                             | Unknown<br>Unknown |
| AsCas12a;<br><i>LbCas12a</i>                       | sgRNA                | ↑          | --           | (2017) sgRNA with chemical modifications[10]                                                                                                                                                       | Unknown            |
| <i>LbCas12a</i>                                    | sgRNA                | --         | --           | (2017) A fusion sgRNA for both Cas9 and Cas12a[11]                                                                                                                                                 | Unknown            |
| <i>LbCas12a</i>                                    | sgRNA                | ↑          | Unknown      | (2018) tRNA-sgRNA intron[12]                                                                                                                                                                       | Unknown            |
| AsCas12a;<br><i>LbCas12a</i>                       | sgRNA                | ↑          | Unknown      | (2018) ribozyme-processed crRNA[9]                                                                                                                                                                 | Unknown            |
| <i>LbCas12a</i>                                    | sgRNA                | --         | Unknown      | (2018) using short and long spacer crRNA[16]                                                                                                                                                       | Unknown            |
| <i>LbCas12a</i>                                    | sgRNA                | ↑          | Unknown      | (2018) truncated pre-tRNA-like sgRNA[7]                                                                                                                                                            | Unknown            |
| AsCas12a                                           | sgRNA                | ↑          | Unknown      | (2018) Extended sgRNA[8]                                                                                                                                                                           | Unknown            |

|                                       |                          |    |    |                                                                                                    |         |
|---------------------------------------|--------------------------|----|----|----------------------------------------------------------------------------------------------------|---------|
| AsCas12a;<br><i>LbCas12a</i>          | sgRNA                    | ↑  | -- | (2018) A U-rich crRNA sgRNA[6]                                                                     | Unknown |
| <i>LbCas12a</i> ;<br><i>FnoCas12a</i> | sgRNA                    | ↑  | -- | (2019) Full-DR-sgRNA[13]                                                                           | Unknown |
| AsCas12a                              | sgRNA                    | -- | ↑  | (2020) Chimeric DNA-RNA sgRNA[14]                                                                  | Unknown |
| AsCas12a;<br><i>LbCas12a</i>          | sgRNA and<br>Cas-protein | ↑  | -- | (2021) Chemical modification[15]                                                                   | Unknown |
| AsCas12a;<br><i>LbCas12a</i>          | Cas-protein              | ↑  | ↑  | This study.<br>AsCas12a-Plus (E174R, R951K, R955A);<br><i>LbCas12a</i> -Plus (D156R, R883K, R887A) | ↑       |

Note: Unless special stated, the comparison is performed with wild-type Cas-nuclease. "--", Comparable. "↑", Enhance/Improve. "↓", Decrease. "Unknow", untested in the study.

**Table S2.** The engineering of the CRISPR-Cas12a (excluded AsCas12a and *LbCas12a*) systems

| Cas12a type                                                                      | Engineering | Efficiency | Specificity | Note                                                                                                                                                                                                                                                   | Targeting Ranges |
|----------------------------------------------------------------------------------|-------------|------------|-------------|--------------------------------------------------------------------------------------------------------------------------------------------------------------------------------------------------------------------------------------------------------|------------------|
| <i>FnCas12a</i>                                                                  | Cas-protein | --         | Unknown     | (2018) <i>FnCas12a</i> -RVR(N623R, K629R and N633R)<br><i>FnCas12a</i> -RR(N623R, K687R) (tested in Plant)[42]                                                                                                                                         | ↑                |
| <i>FnCas12a</i>                                                                  | Cas-protein | ↑          | --          | (2021) ea <i>FnCas12a</i> (Q125R)[54]                                                                                                                                                                                                                  | Unknown          |
| <i>MbCas12a</i> ;<br><i>FnCas12a</i>                                             | Cas-protein | --         | Unknown     | (2018) <i>MbCas12a</i> -RR (N576R, K637R);<br><i>MbCas12a</i> -RVR (N576R, K582V, N586R);<br><i>FnCas12a</i> -RR (N607R, K671R);<br><i>FnCas12a</i> -RVR (N607R, K613V, N617R)[55]                                                                     | ↑                |
| <i>AaCas12a</i>                                                                  | --          | --         | ↑           | (2018) Specificity improved compared to AsCas12a and <i>SpCas9</i> [56]                                                                                                                                                                                | Unknown          |
| <i>CeCas12a</i>                                                                  | Cas-protein | ↑          | --          | (2020) Activity improved compared to AsCas12a and <i>LbCas12a</i> [57]                                                                                                                                                                                 | ↑                |
| <i>PiCas12a</i>                                                                  | Cas-protein | ↑          | Unknown     | (2020) <i>PiCas12a</i> (F604Y)[58]                                                                                                                                                                                                                     | --               |
| <i>FnCas12a</i>                                                                  | Cas-protein | ↑          | --          | (2020) T5 Exonuclease Fusion to <i>FnCas12a</i> [59]                                                                                                                                                                                                   | Unknown          |
| <i>Lb2Cas12a</i>                                                                 | Cas-protein | ↑          | --          | (2021) Lb2-KY (Q571K, C1003Y)[60]                                                                                                                                                                                                                      | --               |
| <i>BsCas12a</i> ;<br><i>PrCas12a</i> ;<br><i>Mb3Cas12a</i>                       | Cas-protein | ↑          | Unknown     | (2021) <i>BsCas12a</i> -3Rv (K155R/N512R/K518R);<br><i>PrCas12a</i> -3Rv (E162R/N519R/K525R);<br><i>Mb3Cas12a</i> -3Rv (D180R/N581R/K587R)[61]                                                                                                         | ↑                |
| <i>Mb2Cas12a</i> ;<br><i>ErCas12a</i> ;<br><i>Lb5Cas12a</i> ;<br><i>BsCas12a</i> | Cas-protein | ↑          | Unknown     | (2021) <i>Mb2Cas12a</i> -RVR(N563R, K569V, N573R);<br><i>Mb2Cas12a</i> -RVRR(N563R, K569V, N573R, K625R)<br><i>ErCas12a</i> -RVR(D529R, K535V, N539R);<br><i>Lb5Cas12a</i> -RVR(N512R, K518V, N522R);<br><i>BsCas12a</i> -RVR(N512R, K518V, N522R)[62] | ↑                |

|                                                                                                                          |        |    |    |                                                        |    |
|--------------------------------------------------------------------------------------------------------------------------|--------|----|----|--------------------------------------------------------|----|
| <i>PrCas12a</i> ;<br><i>ArCas12a</i> ;<br><i>BsCas12a</i> ;<br><i>HkCas12a</i> ;<br><i>LpCas12a</i> ;<br><i>PxCas12a</i> | sgRNA  | ↑  | -- | (2019) optimized crRNA scaffolds[63]                   | -- |
| <i>TsCas12a</i> ;<br><i>MICas12a</i> ;<br><i>BoCas12a</i> ;<br><i>CMaCas12a</i>                                          | others | -- | -- | (2021) The wild-type nuclease, tested in the plant[62] | -- |

Note: Unless special stated, the comparison is performed with the corresponding wild-type Cas-nuclease. "--", Comparable. "↑", Enhance/Improve/Widen. "↓", Decrease. "Unknow", untested in the study.

**Table S3.** The sgRNAs used in this study

| Name     | Sequence(5'-3')              | location (hg19)                                     |
|----------|------------------------------|-----------------------------------------------------|
| Site 6   | TTTNGGGTGATCAGACCCAACAGCAGG  | chr3 - 129108493 129108519                          |
| CCR5-S1  | TTTNTGGGCAACATGCTGGTCATCCTC  | chr3 + 46414526 46414552                            |
| CCR5-S2  | TTTNAAGCAAACACAGCATGGACGACA  | chr3 - 46414780 46414806                            |
| CCR5-S3  | TTTNGGATTCCCAGTAGCAGATGACC   | chr3 - 46415023 46415049                            |
| CD47-S1  | TTTNAGAAATGAGAGAGAAACAAGATG  | chr3 + 107805419 107805445                          |
| CD47-S2  | TTTNATAAAACAAAATCTGTAGAATTC  | chr3 - 107799148 107799174                          |
| CD47-S3  | TTTNTCTCCCCTGCTTCCCACAATAA   | chr3 - 107805249 107805275                          |
| CD47-S4  | TTTNAAAACAGAAAGAACAATACTCATA | chr3 + 107798052 107798078                          |
| SIRPa-S1 | TTTNAAAAGAGAGAGAGAGGGGGGAAA  | chr20 - 1879740 1879766                             |
| SIRPa-S2 | TTTNTACAGTTACAACATTCCTCAACTG | chr20 + 1902671 1902697                             |
| SIRPa-S3 | TTTNTGTCCGGGACACGTTTCCATTCT  | chr20 - 1903070 1903096                             |
| SIRPa-S4 | TTTNACCACTAAGCAGGCATCATTAAAC | chr20 - 1905314 1905340                             |
| CXCR4-S1 | TTTNAAGTCACATCTTGCTAACTCC    | chr2 + 136873755 136873781                          |
| CXCR4-S2 | TTTNCCACGGCATCAACTGCCAGAAG   | chr2 + 136873196 136873222                          |
| PD1-S1   | TTTNCCCAGAATCTCCAGTTCTGAGTC  | chr2 + 242799735 242799761                          |
| PD1-S2   | TTTNAGGCCAGCCAGCACTCTGGCCT   | chr2 - 242792483 242792509                          |
| CTLA4-S1 | TTTNTATGAAGTAGGTAACAAGAT     | chr2 + 204733604 204733630                          |
| RUNX1    | TTTNGCTCCGAAGGTAAGAAATCAT    | chr21 - 36421242 36421268                           |
| RUNX1-S1 | TTTNTGTCTCTGCCCCCTCCCCACT    | chr21 + 37371826 37371852                           |
| DNMT1-S3 | TTTNTGATGGTCCATGTCTGTACTC    | chr19 - 10244443 10244469                           |
| DNMT1-S7 | TTTNGCTCAGCAGGCACCTGCCTCAGC  | chr19 - 10133918 10133944                           |
| EMX1     | TTTNTCCTCCGGTCTGGAACCACACC   | chr2 - 73160921 73160947                            |
| MYOD-S1  | TTTNGGCTACTACGGATAAATAGCCCA  | chr11 + 17741072 17741098                           |
| MYOD-S2  | TTTNCCGCGGATACAGCAGTCGGGTGT  | chr11 + 17740805 17740831                           |
| IL1RN-S1 | TTTNCAGGAGGGTGACTCAGGCTAGCA  | chr2 - 113875317 113875343                          |
| IL1RN-S3 | TTTNTTAGAGCGTTGGGGACCTTGCT   | chr2 + 113875106 113875132                          |
| HBG-S4   | TTTNAACTACAGGCCTCACTGGAGCTA  | chr11 - 5271453 5271479/<br>chr11 - 5276381 5276407 |
| HBG-S5   | TTTNCCTTGTCAGGCTATTGGTCAAG   | chr11 + 5271181 5271207/<br>chr11 + 5276105 5276131 |
| FANCF    | TTTNGTCGGCATGGCCCCATTCGCACG  | chr11 - 22647189 22647215                           |

|                         |                                     |                            |
|-------------------------|-------------------------------------|----------------------------|
| VEGFA-S1                | TTTNCTGGAAAGAGCAGAAGAAAAAGG         | chr6 - 43742342 43742368   |
| BE-S3                   | TTTNTCCGTGTTCTTACTCTGGGCA           | chr11 + 22647490 22647516  |
| Site 16                 | TTTNGAAGCACATCAAGGACATTCTAA         | chr21 + 38860226 38860252  |
| Site 18                 | TTTNGTTTTAAACACACCGGGTTAATAA        | chr9 - 110247058 110247084 |
| NPY1R                   | TTTNAAGCCTCGGGAAACTGCCCTGCC         | chr4 - 164254002 164254028 |
| CHN1                    | TTTNAGCTAAAACGCACACCGGCCCG          | chr2 - 175870275 175870301 |
| SNX13                   | TTTNTCCTCTCCCAGGGCGGGCCAAC          | chr7 - 17980383 17980409   |
| Cas12a-BRAF-WT          | TTTNGTCTAGCTACAGTGAAATCTCGA         | chr7 - 140453126 140453152 |
| Cas12a-BRAF-Mut         | TTTNGTCTAGCTACAGAGAAATCTCGA         | chr7 - 140453126 140453152 |
| Cas9-BRAF-WT            | TAGCTACAGTGAAATCTCGANGG             | chr7 - 140453123 140453145 |
| Cas9-BRAF-Mut           | TAGCTACAGAGAAATCTCGANGG             | chr7 - 140453123 140453145 |
| EGFP-g1                 | TTTNCGTGCGCGTCCAGCTCGACCAGG         |                            |
| EGFP-g2                 | TTTNCTCAGGGCGGACTGGGTGCTCAG         |                            |
| mNeonGreen-g1           | TTTNCAGGCCGCTATGGTGGATGGCAG         |                            |
| mNeonGreen-g2           | TTTNGCGAAGGTGTAGGTGGTCCGGGC         |                            |
| Activation sgRNA        |                                     |                            |
| IL1RN-23bp              | TTTNCAGGAGGGTGACTCAGGCTAGCA         | chr2 - 113875317 113875343 |
| MYOD-23bp               | TTTNC CGG GATACAGCAGTCGGGTGT        | chr11 + 17740805 17740831  |
| HBG-23bp                | TTTNCCTTGTC AAGGCTATTGGTCAAG        | chr11 + 5271181 5271207    |
| Fgf21-23bp              | TTTNTACCCAGACAGGCCCGCCACGT          | chr7 + 45615513 45615539   |
| IL1RN-15bp              | TTTNCAGGAGGGTGACTCA                 | chr2 - 113875325 113875343 |
| MYOD-15bp               | TTTNC CGG GATACAGCAG                | chr11 + 17740805 17740823  |
| Non-canonical-PAM sgRNA |                                     |                            |
| ATTA                    | <u>A</u> TTAGAAGGAGATGCTCCTGTCTCCTG | chr7 + 117232231 117232257 |
| CTTA                    | <u>C</u> TTATTGGGTCAGCTGTTAACATCAGT | chr19 - 10244479 10244505  |
| GTTA                    | <u>G</u> TTATGAACCTGGGTGAAGTCCCAACA | chr2 - 73149328 73149354   |
| TTTA                    | <u>T</u> TTAGGTCATCTGCTACTCGGGAATCC | chr3 + 46399672 46399694   |
| TCTA                    | <u>T</u> CTATAGCCATTGAAGCGCAGCATGTG | chr11 + 22646901 22646927  |

**Table S4.** Primers for this study (including qPCR, T7E1/PAGE, Deep-seq)

| Name                    | Sequence(5'-3')       |
|-------------------------|-----------------------|
| qPCR-IL1RN-F            | GGAATCCATGGAGGGAAGAT  |
| qPCR-IL1RN-R            | TGTTCTCGCTCAGGTCAGTG  |
| qPCR-MYOD-F             | CCGACGGCATGATGGACTAC  |
| qPCR-MYOD-R             | AGGCAGTCTAGGCTCGACAC  |
| qPCR-HBG-F              | GCTGAGTGAAGTGCAGTGTGA |
| qPCR-HBG-R              | GAATTCCTTGCCGAAATGGA  |
| qPCR-Fgf21-F            | CAAGACACTGAAGCCACCT   |
| qPCR-Fgf21-R            | CACCCAGGATTTGAATGACC  |
| qPCR-GAPDH-F            | AGAAGGCTGGGGCTCATTG   |
| qPCR-GAPDH-R            | AGGGGCCATCCACAGTCTTC  |
| Gapdh-qPCR-F1           | GGTGAAGGTCGGTGTGAAC   |
| Gapdh-qPCR-R1           | GAGTGGAGTCATACTGGAAC  |
| PAGE/T7E1-DMNT1-site3-F | ACGCCTGCTCTAAGCACTTG  |

|                          |                                                               |
|--------------------------|---------------------------------------------------------------|
| PAGE/T7E1-DMNT1-site3-R  | TAGTTCTGCCCTCCCGTCAC                                          |
| DMNT1-site3-Deep-Seq-F   | atcgCTCTTTCCCTACACGACGCTCTTCCGATCTIndex1GTCACCTCTGGGGAACACGC  |
| DMNT1-site3-D Deep-Seq-R | ctctACTGGAGTTCAGACGTGTGCTCTTCCGATCTIndex2CCGTGAACGTTCCCTTAGCA |
| Site6-Deep-Seq-F         | atcgCTCTTTCCCTACACGACGCTCTTCCGATCTIndex1CCACATCCTCACCACCTGTTT |
| Site6-Deep-Seq-R         | ctctACTGGAGTTCAGACGTGTGCTCTTCCGATCTIndex2GGACAGGGTGGGTACCTTG  |
| FNACF-Deep-Seq-F         | atcgCTCTTTCCCTACACGACGCTCTTCCGATCTIndex1TGCCCTCCACTGGTTGTGCAG |
| FANCF-Deep-Seq-R         | ctctACTGGAGTTCAGACGTGTGCTCTTCCGATCTIndex2CTTCTGGCGGTCTCAAGCA  |
| MYOD-Deep-Seq-F          | atcgCTCTTTCCCTACACGACGCTCTTCCGATCTIndex1CTACAGCCGCTCTACCCAT   |
| MYOD-Deep-Seq-R          | ctctACTGGAGTTCAGACGTGTGCTCTTCCGATCTIndex2TGCACTTGGCTCTCCGGCA  |
| IL1RN-Deep-Seq-F         | atcgCTCTTTCCCTACACGACGCTCTTCCGATCTIndex1TGACCTCCCATCTTACGCAG  |
| IL1RN-Deep-Seq-R         | ctctACTGGAGTTCAGACGTGTGCTCTTCCGATCTIndex2AGAGTACAAGGAGGAGCCCA |

**Table S5.** Index information for deep-seq

| Genes       | sample           | Index1                 | Index2                                                                                   |                                                                                                                      |
|-------------|------------------|------------------------|------------------------------------------------------------------------------------------|----------------------------------------------------------------------------------------------------------------------|
| DNMT1-site3 | AsCas12a-WT-On   | AGAGTAGA               | TAAGGCGA                                                                                 |                                                                                                                      |
|             | AsCas12a-WT-mm1  | AGAGTAGA               | CTAGTACG                                                                                 |                                                                                                                      |
|             | AsCas12a-WT-mm8  | AGAGTAGA               | TTCTGCCT                                                                                 |                                                                                                                      |
|             | AsCas12a-WT-mm9  | AGAGTAGA               | GCTCAGGA                                                                                 |                                                                                                                      |
|             | AsCas12a-A-On    | TATCCTCT               | TAAGGCGA                                                                                 |                                                                                                                      |
|             | AsCas12a-A-mm1   | TATCCTCT               | CTAGTACG                                                                                 |                                                                                                                      |
|             | AsCas12a-A-mm8   | TATCCTCT               | TTCTGCCT                                                                                 |                                                                                                                      |
|             | AsCas12a-A-mm9   | TATCCTCT               | GCTCAGGA                                                                                 |                                                                                                                      |
|             | AsCas12a-AKK-On  | TAGATCGC               | TAAGGCGA                                                                                 |                                                                                                                      |
|             | AsCas12a-AKK-mm1 | TAGATCGC               | CTAGTACG                                                                                 |                                                                                                                      |
|             | AsCas12a-AKK-mm8 | TAGATCGC               | TTCTGCCT                                                                                 |                                                                                                                      |
|             | AsCas12a-AKK-mm9 | TAGATCGC               | GCTCAGGA                                                                                 |                                                                                                                      |
|             | AsCas12a-AKA-On  | CTCTCTAT               | TAAGGCGA                                                                                 |                                                                                                                      |
|             | AsCas12a-AKA-mm1 | CTCTCTAT               | CTAGTACG                                                                                 |                                                                                                                      |
|             | AsCas12a-AKA-mm8 | CTCTCTAT               | TTCTGCCT                                                                                 |                                                                                                                      |
|             | AsCas12a-AKA-mm9 | CTCTCTAT               | GCTCAGGA                                                                                 |                                                                                                                      |
|             | AsCas12a-KK-On   | GTAAGGAG               | TAAGGCGA                                                                                 |                                                                                                                      |
|             | AsCas12a-KK-mm1  | GTAAGGAG               | CTAGTACG                                                                                 |                                                                                                                      |
|             | AsCas12a-KK-mm8  | GTAAGGAG               | TTCTGCCT                                                                                 |                                                                                                                      |
|             | AsCas12a-KK-mm9  | GTAAGGAG               | GCTCAGGA                                                                                 |                                                                                                                      |
|             | AsCas12a-KA-On   | ACTGCATA               | TAAGGCGA                                                                                 |                                                                                                                      |
|             | AsCas12a-KA-mm1  | ACTGCATA               | CTAGTACG                                                                                 |                                                                                                                      |
|             | AsCas12a-KA-mm8  | ACTGCATA               | TTCTGCCT                                                                                 |                                                                                                                      |
|             | AsCas12a-KA-mm9  | ACTGCATA               | GCTCAGGA                                                                                 |                                                                                                                      |
|             |                  | WT-crRNA<br>(repeat 1) | AsCas12a-WT<br>AsCas12a-KA<br>AsCas12a-KK<br>AsCas12a-RKA<br>AsCas12a-RKK<br>AsCas12a-HF | GACATT<br>GTAAGG<br>ACTGCA<br>CTCTCT<br>AGAGTA<br>TAGATC<br>AGCGTA<br>AGCGTA<br>AGCGTA<br>AGCGTA<br>AGCGTA<br>AGCGTA |

|                        |                                                                                          |                                                                                                  |                                                                    |                                                                    |
|------------------------|------------------------------------------------------------------------------------------|--------------------------------------------------------------------------------------------------|--------------------------------------------------------------------|--------------------------------------------------------------------|
| Site6                  |                                                                                          | Ctrl                                                                                             | AAGGAG                                                             | AGCGTA                                                             |
|                        | WT-crRNA<br>(repeat 2)                                                                   | AsCas12a-WT<br>AsCas12a-KA<br>AsCas12a-KK<br>AsCas12a-RKA<br>AsCas12a-RKK<br>AsCas12a-HF<br>Ctrl | GACATT<br>GTAAGG<br>ACTGCA<br>CTCTCT<br>AGAGTA<br>TAGATC<br>AAGGAG | GCTCAG<br>GCTCAG<br>GCTCAG<br>GCTCAG<br>GCTCAG<br>GCTCAG<br>GCTCAG |
|                        | U4AU6-<br>crRNA<br>(repeat 1)                                                            | AsCas12a-WT<br>AsCas12a-KA<br>AsCas12a-KK<br>AsCas12a-RKA<br>AsCas12a-RKK<br>AsCas12a-HF<br>Ctrl | GACATT<br>GTAAGG<br>ACTGCA<br>CTCTCT<br>AGAGTA<br>TAGATC<br>AAGGAG | TCGCCT<br>TCGCCT<br>TCGCCT<br>TCGCCT<br>TCGCCT<br>TCGCCT<br>TCGCCT |
|                        | U4AU6-<br>crRNA<br>(repeat 2)                                                            | AsCas12a-WT<br>AsCas12a-KA<br>AsCas12a-KK<br>AsCas12a-RKA<br>AsCas12a-RKK<br>AsCas12a-HF<br>Ctrl | GACATT<br>GTAAGG<br>ACTGCA<br>CTCTCT<br>AGAGTA<br>TAGATC<br>AAGGAG | AGGAGT<br>AGGAGT<br>AGGAGT<br>AGGAGT<br>AGGAGT<br>AGGAGT<br>AGGAGT |
|                        | tRNA-crRNA<br>(repeat 1)                                                                 | AsCas12a-WT<br>AsCas12a-KA<br>AsCas12a-KK<br>AsCas12a-RKA<br>AsCas12a-RKK<br>AsCas12a-HF<br>Ctrl | GACATT<br>GTAAGG<br>ACTGCA<br>CTCTCT<br>AGAGTA<br>TAGATC<br>AAGGAG | CTAGTA<br>CTAGTA<br>CTAGTA<br>CTAGTA<br>CTAGTA<br>CTAGTA<br>CTAGTA |
|                        | tRNA-crRNA<br>(repeat 2)                                                                 | AsCas12a-WT<br>AsCas12a-KA<br>AsCas12a-KK<br>AsCas12a-RKA<br>AsCas12a-RKK<br>AsCas12a-HF<br>Ctrl | GACATT<br>GTAAGG<br>ACTGCA<br>CTCTCT<br>AGAGTA<br>TAGATC<br>AAGGAG | CATGCC<br>CATGCC<br>CATGCC<br>CATGCC<br>CATGCC<br>CATGCC<br>CATGCC |
|                        | WT-crRNA<br>(repeat 1)                                                                   | AsCas12a-WT<br>AsCas12a-KA<br>AsCas12a-KK<br>AsCas12a-RKA<br>AsCas12a-RKK<br>AsCas12a-HF<br>Ctrl | TATCCT<br>GTAAGG<br>ACTGCA<br>CTCTCT<br>AGAGTA<br>TAGATC<br>AAGGAG | TTCTGC<br>TTCTGC<br>TTCTGC<br>TTCTGC<br>TTCTGC<br>TTCTGC<br>TTCTGC |
| WT-crRNA<br>(repeat 2) | AsCas12a-WT<br>AsCas12a-KA<br>AsCas12a-KK<br>AsCas12a-RKA<br>AsCas12a-RKK<br>AsCas12a-HF | TATCCT<br>GTAAGG<br>ACTGCA<br>CTCTCT<br>AGAGTA<br>TAGATC                                         | GCTCAG<br>GCTCAG<br>GCTCAG<br>GCTCAG<br>GCTCAG<br>GCTCAG           |                                                                    |

|                           |                          |                                                                                                  |                                                                    |                                                                    |                                      |
|---------------------------|--------------------------|--------------------------------------------------------------------------------------------------|--------------------------------------------------------------------|--------------------------------------------------------------------|--------------------------------------|
| FANCF                     |                          | Ctrl                                                                                             | AAGGAG                                                             | GCTCAG                                                             |                                      |
|                           | U4AU6-crRNA (repeat 1)   | AsCas12a-WT<br>AsCas12a-KA<br>AsCas12a-KK<br>AsCas12a-RKA<br>AsCas12a-RKK<br>AsCas12a-HF<br>Ctrl | TATCCT<br>GTAAGG<br>ACTGCA<br>CTCTCT<br>AGAGTA<br>TAGATC<br>AAGGAG | TCGCCT<br>TCGCCT<br>TCGCCT<br>TCGCCT<br>TCGCCT<br>TCGCCT<br>TCGCCT |                                      |
|                           | U4AU6-crRNA (repeat 2)   | AsCas12a-WT<br>AsCas12a-KA<br>AsCas12a-KK<br>AsCas12a-RKA<br>AsCas12a-RKK<br>AsCas12a-HF<br>Ctrl | TATCCT<br>GTAAGG<br>ACTGCA<br>CTCTCT<br>AGAGTA<br>TAGATC<br>AAGGAG | AGGAGT<br>AGGAGT<br>AGGAGT<br>AGGAGT<br>AGGAGT<br>AGGAGT<br>AGGAGT |                                      |
|                           | tRNA-crRNA (repeat 1)    | AsCas12a-WT<br>AsCas12a-KA<br>AsCas12a-KK<br>AsCas12a-RKA<br>AsCas12a-RKK<br>AsCas12a-HF<br>Ctrl | TATCCT<br>GTAAGG<br>ACTGCA<br>CTCTCT<br>AGAGTA<br>TAGATC<br>AAGGAG | CTAGTA<br>CTAGTA<br>CTAGTA<br>CTAGTA<br>CTAGTA<br>CTAGTA<br>CTAGTA |                                      |
|                           | tRNA-crRNA (repeat 2)    | AsCas12a-WT<br>AsCas12a-KA<br>AsCas12a-KK<br>AsCas12a-RKA<br>AsCas12a-RKK<br>AsCas12a-HF<br>Ctrl | TATCCT<br>GTAAGG<br>ACTGCA<br>CTCTCT<br>AGAGTA<br>TAGATC<br>AAGGAG | CATGCC<br>CATGCC<br>CATGCC<br>CATGCC<br>CATGCC<br>CATGCC<br>CATGCC |                                      |
|                           | MYOD<br>(23bp and 15 bp) | Repeat 1                                                                                         | WT-VPR<br>RKA-VPR<br>HF-VPR<br>Ctrl                                | GACATT<br>TAGATC<br>CTCTCT<br>AGAGTA                               | AGCGTA<br>AGCGTA<br>AGCGTA<br>AGCGTA |
|                           |                          | Repeat 2                                                                                         | WT-VPR<br>RKA-VPR<br>HF-VPR<br>Ctrl                                | GACATT<br>TAGATC<br>CTCTCT<br>AGAGTA                               | TCGCCT<br>TCGCCT<br>TCGCCT<br>TCGCCT |
|                           |                          | Repeat 3                                                                                         | WT-VPR<br>RKA-VPR<br>HF-VPR<br>Ctrl                                | GACATT<br>TAGATC<br>CTCTCT<br>AGAGTA                               | CTAGTA<br>CTAGTA<br>CTAGTA<br>CTAGTA |
| IL1RN<br>(23bp and 15 bp) | Repeat 1                 | WT-VPR<br>RKA-VPR<br>HF-VPR<br>Ctrl                                                              | GACATT<br>TAGATC<br>CTCTCT<br>AGAGTA                               | AGCGTA<br>AGCGTA<br>AGCGTA<br>AGCGTA                               |                                      |
|                           | Repeat 2                 | WT-VPR<br>RKA-VPR<br>HF-VPR<br>Ctrl                                                              | GACATT<br>TAGATC<br>CTCTCT<br>AGAGTA                               | TCGCCT<br>TCGCCT<br>TCGCCT<br>TCGCCT                               |                                      |

|  |          |                                     |                                      |                                      |
|--|----------|-------------------------------------|--------------------------------------|--------------------------------------|
|  | Repeat 3 | WT-VPR<br>RKA-VPR<br>HF-VPR<br>Ctrl | GACATT<br>TAGATC<br>CTCTCT<br>AGAGTA | CTAGTA<br>CTAGTA<br>CTAGTA<br>CTAGTA |
|--|----------|-------------------------------------|--------------------------------------|--------------------------------------|

**Supplementary sequences:** DNA and Amino acid sequences used in this study

- Amplicons for high-throughput sequencing analysis

DMNT1-site3:

GTCACTCTGGGGAACACGCCCGGTGTACGCCACTTGACAGGC **GAGTAACAGACATGGACCATCAG** GAAA  
CATTAACTACTGATGTTAACAGCTGACCCAATAAGTGGCAGAGTGCTAAGGGAACGTTACGG

FANCF:

TGCCTCCACTGGTTGTGCAGCCGCGCTCCAGAGC **CGTGCGAATGGGGCCATGCCGACC** CAAAGCGCCGAT  
GGATGTGGCGCAGGTAGCGCGCCCACTGCAAGGCCCGGCGCACGGTGGCGGGTCCCAGGTGCTGACG  
TAGGTAGTGCTTGAGACCGCCAGAAG

Site 6:

CCACATCCTCACCACCTGTTTGTGACGCCCTCCACACTTGATAGCCCCCTGGTCCCATTTTGTCTCTCAA  
CTGTCTTTCTCATTCTGGACTCCACTGGACTTCGTCGCCCCCATGA **CCTGCTGTTGGGTCTGATCACCCC**  
AAAAGAAATGAGGTTTGAGTATGTTAGAGTATGCCAAGGTAACCCACCCTGTCC

MYOD:

CTACAGCCGCTCTACCCATGGGTCCCCACAAATCAGGGGACAGAGGAGTATTGAAAGTCAGCTCAGAGGT  
GAGCGCGCGCAGCCAGCG TTTC **CCGCGGATACAGCAGTCGGGTG**TTGGAGAGGTTTGGAAAGGGCGTGC  
CGGAGAGCCAAGTGCA

IL1RN:

TGACCTCCCATCTTACGCAGATAAGAACCAGTTTGG TTTC **TGCTAGCCTGAGTCACCCTCCTG**GAAACTGGG  
CCTGCTTGGCATCAAGTCAGCCATCAGCCGGCCATCTCCTCATGCTGGCCAACCCTCTGTGAGTGTGTGG  
GAGGGGAGGCTGGGCTCCTCCTTGTACTCT

- Expression of the pe-tRNA

Red: EF1a core promoter, blue: tRNA, orange: AsCpf1-crRNA scaffold, violet: SV40 polyA

**GGGCAGAGCGCACATCGCCACAGTCCCCGAGAAGTTGGGGGGAGGGGTTCGGCAATTGATCCGGTGCCT**  
**AGAGAAGGTGGCGCGGGGTAAACTGGGAAAGTGATGTCGTGACTGGCTCCGCCTTTTTCCGAGGGTGG**  
**GGGAGAACCGTATATAAGTGCAGTAGTCGCCGTGAACGTTCTTTTTCGCAACGGGTTTGCCGCCAGAACACA**  
**GCCAGTGGTCTAGTGGTAGAATAGTACCCTGCCACGGTACAGACCCGGGTTTCGATTCCCGGCTGGAAT****AA**  
**TTCTACTCTTGTAGAT**/23bp-sgRNA/TTTTTTGGATCCACTAGTTCTAGAAACTTGTTTATTGCAGCTTATAATGG  
TTACAAATAAAGCAATAGCATCACAAATTTACAAATAAAGCATTTTTTTCACTGCATTCTAGTTGTGGTTTGTG  
CAAACCTCATCAATGTATCTTA

- Expression of the T4AT6-crRNA

Red: U6 promoter, orange: AsCpf1-crRNA scaffold, violet: T4AT6 motif

**AAGGTCGGGCAGGAAGAGGGCCTATTTCCCATGATTCTTCATATTTGCATATACGATACAAGGCTGTTAGAG**  
**AGATAATTAGAATTAATTTGACTGTAAACACAAAGATATTAGTACAAAATACGTGACGTAGAAAGTAATAATTTCT**  
**TGGGTAGTTTGCAGTTTTAAAATTATGTTTTAAATGGACTATCATATGCTTACCGTAACTTGAAGTATTTTCGAT**  
**TTCTTGGCTTTATATATCTTGTGGAAAGGACGAAACACCGT****AA****TTCTACTCTTGTAGAT**/20bp-sgRNA/TTTTAT  
TTTTT

- Expression of crRNA array

Red: U6 promoter, orange: AsCpf1-crRNA scaffold, sgRNA targeted to DNMT1-S7, EMX1, CTLA4-S1, CCR5-S1, SIRPa-S3, RUNX1-S1

**AAGGTCGGGCAGGAAGAGGGCCTATTTCCCATGATTCTTCATATTTGCATATACGATACAAGGCTGTTAGAG**  
**AGATAATTAGAATTAATTTGACTGTAAACACAAAGATATTAGTACAAAATACGTGACGTAGAAAGTAATAATTTCT**  
**TGGGTAGTTTGCAGTTTTAAAATTATGTTTTAAATGGACTATCATATGCTTACCGTAACTTGAAGTATTTTCGAT**



TTCTTGGCTTTATATATCTTGTGGAAAGGACGAAACACCGTAATTTCTACTCTTGTAGATGCTCAGCAGGCACC  
TGCCTCAGCAATTTCTACTCTTGTAGATTCTCTCCGGTTCTGGAACCACACC AATTTCTACTCTTGTAGATTATG  
AAGTAGGTA CTCAAAGATAATTTCTACTCTTGTAGATTGGGCAACATGCTGGTCATCCTCAATTTCTACTCTT  
GTAGATTGTCCGGGACACGTTTCCATTCTAATTTCTACTCTTGTAGATTGTCTCTCTGCCCCCTCCCACTTTT  
TTTTG

● dWT-VPR: pCAG-dAsCpf1-WT (D908A)-NLS-3xHA-VPR

Human codon optimized Acidaminococcus sp. BV3L6 Cpf1 (AsCpf1) is black, mutant site highlighted with red, nucleoplasmin NLS with blue, 3xHA with orange, VPR with violet

ATGACACAGTTCGAGGGCTTTACCAACCTGTATCAGGTGAGCAAGACACTGCGGTTTGAGCTGATCCCACA  
GGGCAAGACCCTGAAGCACATCCAGGAGCAGGGCTTCATCGAGGAGGACAAGGCCCGCAATGATCACTAC  
AAGGAGCTGAAGCCCATCATCGATCGGATCTACAAGACCTATGCCGACCAGTGCCTGCAGCTGGTGCAGCT  
GGATTGGGAGAACCTGAGCGCCGCCATCGACTCCTATAGAAAGGAGAAAACCGAGGAGACAAGGAACGCC  
CTGATCGAGGAGCAGGCCACATATCGCAATGCCATCCACGACTACTTCATCGGCCGGACAGACAACCTGAC  
CGATGCCATCAATAAGAGACACGCCGAGATCTACAAGGGCCTGTTCAAGGCCGAGCTGTTTAATGGCAAGGT  
GCTGAAGCAGCTGGGCACCGTGACCACAACCGAGCACGAGAACGCCCTGCTGCGGAGCTTCGACAAGTTT  
ACAACCTACTTCTCCGGCTTTTATGAGAACAGGAAGAAGCTGTTTCAGCGCCGAGGATATCAGCACAGCCATC  
CCACACCCGCATCGTGCAGGACAACCTTCCCCAAGTTTAAGGAGAATTGTACATCTTCACACGCCTGATCACC  
GCCGTGCCAGCCTGCGGGAGCACTTTGAGAACGTGAAGAAGGCCATCGGCATCTTCGTGAGCACCTCCA  
TCGAGGAGGTGTTTTCTTCCCTTTTTATAACCAGCTGCTGACACAGACCCAGATCGACCTGTATAACCAGCT  
GCTGGGAGGAATCTCTCGGGAGGCAGGCACCGAGAAGATCAAGGGCCTGAACGAGGTGCTGAATCTGGCC  
ATCCAGAAGAATGATGAGACAGCCACATCATCGCCTCCCTGCCACACAGATTCATCCCCTGTTTAAGCAG  
ATCCTGTCCGATAGGAACACCCTGTCTTTCATCCTGGAGGAGTTTAAGAGCGACGAGGAAGTGATCCAGTCC  
TTCTGCAAGTACAAGACACTGCTGAGAAACGAGAACGTGCTGGAGACAGCCGAGGCCCTGTTTAACGAGCT  
GAACAGCATCGACCTGACACACATCTTCATCAGCCACAAGAAGCTGGAGACAATCAGCAGCGCCCTGTGCG  
ACCACTGGGATACACTGAGGAATGCCCTGTATGAGCGGAGAATCTCCGAGCTGACAGGCAAGATCACCAAG  
TCTGCCAAGGAGAAGGTGCAGCGCAGCCTGAAGCACGAGGATATCAACCTGCAGGAGATCATCTCTGCCGC  
AGGCAAGGAGCTGAGCGAGGCCTTCAAGCAGAAAACCAGCGAGATCCTGTCCCACGCACACGCCGCCCTG  
GATCAGCCACTGCCTACAACCCTGAAGAAGCAGGAGGAGAAGGAGATCCTGAAGTCTCAGCTGGACAGCCT  
GCTGGGCCTGTACCACCTGCTGGACTGGTTTGCCGTGGATGAGTCCAACGAGGTGGACCCCGAGTTCTCT  
GCCC GGCTGACCGGCATCAAGCTGGAGATGGAGCCTTCTCTGAGCTTCTACAACAAGGCCAGAAATTATGC  
CACCAAGAAGCCCTACTCCGTGGAGAAGTTCAAGCTGAACTTTCAGATGCCTACTACTGGCCTCTGGCTGGG  
ACGTGAATAAGGAGAAGAACAATGGCGCCATCCTGTTTGTGAAGAACGGCCTGTACTATCTGGGCATCATGC  
CAAAGCAGAAGGGCAGGTATAAGGCCCTGAGCTTCGAGCCCACAGAGAAAACCAGCGAGGGGCTTTGATAAG  
ATGTACTATGACTACTTCCCTGATGCCGCCAAGATGATCCCAAAGTGCAGCACCCAGCTGAAGGCCGTGACA  
GCCCACTTTCAGACCCACACAACCCCCATCCTGCTGTCCAACAATTTTCATCGAGCCTCTGGAGATCACAAAG  
GAGATCTACGACCTGAACAATCCTGAGAAGGAGCCAAAGAAGTTTCAGACAGCCTACGCCAAGAAAACCGG  
CGACCAGAAGGGCTACAGAGAGGCCCTGTGCAAGTGGATCGACTTCACAAGGGATTTTCTGTCCAAGTATA  
CCAAGACAACCTCTATCGATCTGTCTAGCCTGCGGCCATCCTCTCAGTATAAGGACCTGGGCGAGTACTATG  
CCGAGCTGAATCCCCTGCTGTACCACATCAGCTTCCAGAGAATCGCCGAGAAGGAGATCATGGATGCCGTG  
GAGACAGGCAAGCTGTACCTGTTCCAGATCTATAACAAGGACTTTGCCAAGGGCCACCACGGCAAGCCTAAT  
CTGCACACACTGTATTGGACCGGCCTGTTTTCTCCAGAGAACCTGGCCAAGACAAGCATCAAGCTGAATGG  
CCAGGCCGAGCTGTTCTACCGCCCTAAGTCCAGGATGAAGAGGATGGCACACCGGCTGGGAGAGAAGATG  
CTGAACAAGAAGCTGAAGGATCAGAAAACCCAATCCCCGACACCCTGTACCAGGAGCTGTACGACTATGT  
GAATCACAGACTGTCCCACGACCTGTCTGATGAGGCCAGGGCCCTGCTGCCAACGTGATCACCAAGGAG  
GTGTCTCACGAGATCATCAAGGATAGGCGCTTACCAGCGACAAGTTCTTTTTCCAGTGCCTATCACACTGA  
ACTATCAGGCCGCCAATTCCCCTAAGTTCAACCAGAGGGTGAATGCCTACCTGAAGGAGCACCCCGAG  
ACACCTATCATCGGCATCGCCGGGGCGAGAGAAACCTGATCTATATCACAGTGATCGACTCCACCGGCAAG  
ATCCTGGAGCAGCGGAGCCTGAACACCATCCAGCAGTTTGATTACCAGAAGAAGCTGGACAACAGGGAGAA  
GGAGAGGGTGGCAGCAAGGCAGGCCTGGTCTGTGGTGGGCACAATCAAGGATCTGAAGCAGGGCTATCTG

AGCCAGGTCATCCACGAGATCGTGGACCTGATGATCCACTACCAGGCCGTGGTGGTGGTGGGAGAACCCTGAA  
TTTTGGCTTTAAGAGCAAGAGGACCGGCATCGCCGAGAAGGCCGTGTACCAGCAGTTTCGAGAAGATGCTGA  
TCGATAAGCTGAATTGCCTGGTGGTGAAGGACTATCCAGCAGAGAAAAGTGGGAGGCCGTGCTGAACCCATAC  
CAGCTGACAGACCAGTTCACCTCCTTTGCCAAGATGGGCACCCAGTCTGGCTTCTGTTTTACGTGCCTGC  
CCATATACATCTAAGATCGATCCCCTGACCGGCTTCGTGGACCCCTTCGTGTGGAAAACCATCAAGAATCAC  
GAGAGCCGCAAGCACTTCTGGAGGGCTTCGACTTTCTGCACTACGACGTGAAAACCGGCCGACTTCATCCT  
GCACTTTAAGATGAACAGAAATCTGTCTTCCAGAGGGGCCTGCCCGGCTTTATGCCTGCATGGGATATCGT  
GTTTCGAGAAGAACGAGACACAGTTTGACGCCAAGGGCACCCCTTTCATCGCCGGCAAGAGAATCGTGCCA  
GTGATCGAGAATCACAGATTCACCGGCAGATACCGGGACCTGTATCCTGCCAACGAGCTGATCGCCCTGCT  
GGAGGAGAAGGGCATCGTGTTCAGGGATGGCTCCAACATCCTGCCAAAGCTGCTGGAGAATGACGATTCTC  
ACGCCATCGACACCATGGTGGCCCTGATCCGCAGCGTGTGTCAGATGCGGAACTCCAATGCCGCCACAGG  
CGAGGACTATATCAACAGCCCCGTGCGCGATCTGAATGGCGTGTGCTTCGACTCCCGGTTTCAGAACCCAG  
AGTGGCCCATGGACGCCGATGCCAATGGCGCCTACCACATCGCCCTGAAGGGCCAGCTGCTGCTGAATCA  
CCTGAAGGAGAGCAAGGATCTGAAGCTGCAGAACGGCATCTCCAATCAGGACTGGCTGGCCTACATCCAGG  
AGCTGCGCAACAAAAGGCCGGCGGCCACGAAAAAGGCCGGCCAGGCCAAAAAGAAAAAGGGATCC**TACCC**  
**ATACGATGTTCCAGATTACGCTTATCCCTACGACGTGCCTGATTATGCATACCCATACGATGTCCCCGACTATG**  
**CC**CTCGAGAGCACCGGTGATGCTTTAGACGATTTTACTTAGATATGCTTGGTTCAGACGCGTTAGACGACT  
TCGACCTAGACATGTTAGGCTCAGATGCATTGGACGACTTCGATTTAGATATGTTGGGCTCCGATGCCCTAGA  
TGACTTTGATCTAGATATGCTAGGAGGAAGCGGAGGAGGAGGTAGCGGACCTAAGAAAAAGAGGAAGGTGG  
CGGCCGCTGGATCCCCTTCAGGGCAGATCAGCAACCAGGCCCTGGCTCTGGCCCTAGCTCCGCTCCAGT  
GCTGGCCAGACTATGGTGCCTCTAGTGTATGGTGCCTCTGGCCAGCCACCTGCTCCAGCCCTGTGC  
TGACCCAGGACCACCCAGTCACTGAGCGCTCCAGTGCCCAAGTCTACACAGGCCGGCGAGGGGACTCT  
GAGTGAAGCTCTGCTGCACCTGCAGTTCGACGCTGATGAGGACCTGGGAGCTCTGCTGGGGAACAGCACC  
GATCCCGGAGTGTTACAGATCTGGCCTCCGTGGACAACCTCTGAGTTTCAGCAGCTGCTGAATCAGGGCGT  
GTCCATGTCTCATAGTACAGCCGAACCAATGCTGATGGAGTACCCCGAAGCCATTACCCGGCTGGTGACCG  
GCAGCCAGCGGCCCCCGACCCCGCTCCAACCTCCCCTGGGAACCAGCGGCCCTGCCTAATGGGCTGTCCG  
GAGATGAAGACTTCTCAAGCATCGCTGATATGGACTTTAGTGCCCTGCTGTACAGATTTCTCTAGTGGGT  
TGGCAGCGGCAGCGACCTTTCCCATCCGCCCCCAAGGGGCCATCTGGATGAGCTGACAACCACACTTGAG  
TCCATGACCGAGGATCTGAACCTGGACTACCCCTGACCCCGAATTGAACGAGATTCTGGATACCTTCTG  
AACGACGAGTGCTCTTGCATGCCATGCATATCAGCACAGGACTGTCCATCTTCGACACATCTCTGTTAAGT  
AA

● dRKA-VPR: pCAG-dAsCpf1-RKA(E174R/R951K/R955A/D908A)-NLS-3xHA-VPR

Human codon optimized Acidaminococcus sp. BV3L6 Cpf1 (AsCpf1) is black, mutant site highlighted with red, nucleoplasmin NLS with blue, 3xHA with orange, VPR with violet

ATGACACAGTTCGAGGGCTTTACCAACCTGTATCAGGTGAGCAAGACACTGCGGTTTGAGCTGATCCACA  
GGGCAAGACCCTGAAGCACATCCAGGAGCAGGGCTTCATCGAGGAGGACAAGGCCCGCAATGATCACTAC  
AAGGAGCTGAAGCCCATCATCGATCGGATCTACAAGACCTATGCCGACCAGTGCCTGCAGCTGGTGCAGCT  
GGATTGGGAGAACCCTGAGCGCCGCCATCGACTCCTATAGAAAGGAGAAAACCGAGGAGACAAGGAACGCC  
CTGATCGAGGAGCAGGCCACATATCGCAATGCCATCCACGACTACTTCATCGGCCGGACAGACAACCTGAC  
CGATGCCATCAATAAGAGACACGCCGAGATCTACAAGGGCCTGTTCAAGGCCGAGCTGTTTAATGGCAAGGT  
GCTGAAGCAGCTGGGCACCGTGACCACAACCGAGCACGAGAACGCCCTGCTGCGGAGCTTCGACAAGTTT  
ACAACCTACTTCTCCGGCTTTTATAGA AACAGGAAGAACGTGTTTCAGCGCCGAGGACATTAGCACAGCCATC  
CCACACCGCATCGTGCAGGACAACCTTCCCAAGTTTAAGGAGAATTGTCACATCTTCACACGCCTGATCACC  
GCCGTGCCAGCCTGCGGGAGCACTTTGAGAACGTGAAGAAGGCCATCGGCATCTTCGTGAGCACCTCCA  
TCGAGGAGGTGTTTTCTTCCCTTTTATAACCAGCTGCTGACACAGACCCAGATCGACCTGTATAACCAGCT  
GCTGGGAGGAATCTCTCGGGAGGCAGGCACCGAGAAGATCAAGGGCCTGAACGAGGTGCTGAATCTGGCC  
ATCCAGAAGAATGATGAGACAGCCACATCATCGCCTCCCTGCCACACAGATTCATCCCCCTGTTTAAGCAG  
ATCCTGTCCGATAGGAACACCCTGTCTTTCATCCTGGAGGAGTTTAAGAGCGACGAGGAAGTGATCCAGTCC  
TTCTGCAAGTACAAGACACTGCTGAGAAACGAGAACGTGCTGGAGACAGCCGAGGCCCTGTTTAACGAGCT

GAACAGCATCGACCTGACACACATCTTCATCAGCCACAAGAAGCTGGAGACAATCAGCAGCGCCCTGTGCG  
ACCACTGGGATACACTGAGGAATGCCCTGTATGAGCGGAGAATCTCCGAGCTGACAGGCAAGATCACCAAG  
TCTGCCAAGGAGAAGGTGCAGCGCAGCCTGAAGCACGAGGATATCAACCTGCAGGAGATCATCTCTGCCG  
AGGCAAGGAGCTGAGCGAGGCCTTCAAGCAGAAAACCAGCGAGATCCTGTCCCACGCACACGCCGCCCTG  
GATCAGCCACTGCCTACAACCCTGAAGAAGCAGGAGGAGAAGGAGATCCTGAAGTCTCAGCTGGACAGCCT  
GCTGGGCCTGTACCACCTGCTGGACTGGTTTGCCGTGGATGAGTCCAACGAGGTGGACCCCGAGTTCTCT  
GCCCCGGCTGACCGGCATCAAGCTGGAGATGGAGCCTTCTCTGAGCTTCTACAACAAGGCCAGAAATTATGC  
CACCAAGAAGCCCTACTCCGTGGAGAAGTTCAAGCTGAACTTTTCAAGTGCCTACTGGCCTCTGGCTGGG  
ACGTGAATAAGGAGAAGAACAATGGCGCCATCCTGTTTGTGAAGAACGGCCTGTACTATCTGGGCATCATGC  
CAAAGCAGAAGGGCAGGTATAAGGCCCTGAGCTTCGAGCCCACAGAGAAAACCAGCGAGGGCTTTGATAAG  
ATGTACTATGACTACTTCCCTGATGCCGCCAAGATGATCCCAAAGTGCAGCACCCAGCTGAAGGCCGTGACA  
GCCACTTTTCAAGACCCACACAACCCCCATCCTGCTGTCCAACAATTTTATCGAGCCTCTGGAGATCACAAAG  
GAGATCTACGACCTGAACAATCCTGAGAAGGAGCCAAAGAAGTTTCAAGACAGCCTACGCCAAGAAAACCGG  
CGACCAGAAGGGCTACAGAGAGGCCCTGTGCAAGTGGATCGACTTACAAGGGATTTTCTGTCCAAGTATA  
CCAAGACAACCTCTATCGATCTGTCTAGCCTGCGGCCATCCTCTCAGTATAAGGACCTGGGCGAGTACTATG  
CCGAGCTGAATCCCCTGCTGTACCACATCAGCTTCCAGAGAATCGCCGAGAAGGAGATCATGGATGCCGTG  
GAGACAGGCAAGCTGTACCTGTTCCAGATCTATAACAAGGACTTTTGCCAAGGGCCACCACGGCAAGCCTAAT  
CTGCACACACTGTATTGGACCGGCCTGTTTTCTCCAGAGAACCTGGCCAAGACAAGCATCAAGCTGAATGG  
CCAGGCCGAGCTGTTCTACCGCCCTAAGTCCAGGATGAAGAGGATGGCACACCGGCTGGGAGAGAAGATG  
CTGAACAAGAAGCTGAAGGATCAGAAAACCCCAATCCCCGACACCCTGTACCAGGAGCTGTACGACTATGT  
GAATCACAGACTGTCCCACGACCTGTCTGATGAGGCCAGGGCCCTGCTGCCAACGTGATCACCAAGGAG  
GTGTCTCACGAGATCATCAAGGATAGGCGCTTACCAGCGACAAGTTCTTTTTCCACGTGCCTATCACACTGA  
ACTATCAGGCCGCCAATTTCCCCTAAGTTCAACCAGAGGGTGAATGCCCTACCTGAAGGAGCACCCCGAG  
ACACCTATCATCGGCATCGCCGGGGCGAGAGAAACCTGATCTATATCACAGTGATCGACTCCACCGGCAAG  
ATCCTGGAGCAGCGGAGCCTGAACACCATCCAGCAGTTTGATTACCAGAAGAAGCTGGACAACAGGGAGAA  
GGAGAAGGTGGCGGCCGCTCAGGCCTGGTCTGTGGTGGGCACAATCAAGGATCTGAAGCAGGGCTATCTG  
AGCCAGGTCATCCACGAGATCGTGGACCTGATGATCCACTACCAGGCCGTGGTGGTGGTGGAGAACCTGAA  
TTTTCGGCTTTAAGAGCAAGAGGACCGGCATCGCCGAGAAGGCCGTGTACCAGCAGTTCCGAGAAGATGCTGA  
TCGATAAGCTGAATTGCCTGGTGGTGAAGGACTATCCAGCAGAGAAAGTGGGAGGCGTGCTGAACCCATAC  
CAGCTGACAGACCAGTTCACCTCCTTTGCCAAGATGGGCACCCAGTCTGGCTTCTGTTTTACGTGCCTGC  
CCCATATACATCTAAGATCGATCCCCTGACCGGCTTCGTGGACCCCTTCGTGTGGAAAACCATCAAGAATCAC  
GAGAGCCGCAAGCACTTCTGGAGGGCTTCGACTTTCTGCACTACGACGTGAAAACCGGCGACTTCATCCT  
GCACTTTAAGATGAACAGAAATCTGTCTTCCAGAGGGGCCTGCCCGGCTTTATGCCTGCATGGGATATCGT  
GTTCCGAGAAGAACGAGACACAGTTTGACGCCAAGGGCACCCCTTTTATCGCCGCAAGAGAATCGTGCCA  
GTGATCGAGAATCACAGATTCACCGGCAGATACCGGGACCTGTATCCTGCCAACGAGCTGATCGCCCTGCT  
GGAGGAGAAGGGCATCGTGTTCCAGGGATGGCTCCAACATCCTGCCAAAGCTGCTGGAGAATGACGATTCTC  
ACGCCATCGACACCATGGTGGCCCTGATCCGCAGCGTGCTGCAGATGCGGAACTCCAATGCCGCCACAGG  
CGAGGACTATATCAACAGCCCCGTGCGCGATCTGAATGGCGTGTGCTTCCACTCCCGGTTTTCAGAACCCAG  
AGTGGCCCATGGACGCCGATGCCAATGGCGCCTACCACATCGCCCTGAAGGGCCAGCTGCTGCTGAATCA  
CCTGAAGGAGAGCAAGGATCTGAAGCTGCAGAACGGCATCTCCAATCAGGACTGGCTGGCCTACATCCAGG  
AGCTGCGCAACAAGGAGGCGGCGGCCACGAAAAGGCGGCCAGGCAAAAAAGAAAAGGGATCCATACC  
CATACGATGTTCCAGATTACGCTTATCCCTACGACGTGCCTGATTATGCATACCCATACGATGTCCCCGACTAT  
GCCCTCGAGAGCACCGGTGATGCTTTAGACGATTTTGACTTAGATATGCTTGGTTTCAGACGCGTTAGACGAC  
TTCGACCTAGACATGTTAGGCTCAGATGCATTGGACGACTTCGATTTAGATATGTTGGGCTCCGATGCCCTAG  
ATGACTTTGATCTAGATATGCTAGGAGGAAGCGGAGGAGGAGGTAGCGGACCTAAGAAAAGAGGAAGGTG  
GCGGCCGCTGGATCCCCTCAGGGCAGATCAGCAACCAGGCCCTGGCTCTGGCCCCTAGCTCCGCTCCAG  
TGCTGGCCCAGACTATGGTGCCCTCTAGTGCTATGGTGCCTCTGGCCCAGCCACTGCTCCAGCCCCTGTG  
CTGACCCCAGGACCACCCAGTCACTGAGCGCTCCAGTGCCCAAGTCTACACAGGCGGCGAGGGGACTC  
TGAGTGAAGCTCTGCTGCACCTGCAGTTCGACGCTGATGAGGACCTGGGAGCTCTGCTGGGGAACAGCAC

CGATCCCGGAGTGTTCACAGATCTGGCCTCCGTGGACAACCTCTGAGTTTCAGCAGCTGCTGAATCAGGGCG  
TGTCCATGTCTCATAGTACAGCCGAACCAATGCTGATGGAGTACCCCGAAGCCATTACCCGGCTGGTGACCG  
GCAGCCAGCGGCCCCCGACCCCGCTCCAACCTCCCTGGGAACCAGCGGCCCTGCCTAATGGGCTGTCCG  
GAGATGAAGACTTCTCAAGCATCGCTGATATGGACTTTAGTGCCCTGCTGTCACAGATTTCTCTAGTGGGT  
TGGCAGCGGCAGCGACCTTTCCCATCCGCCCCCAAGGGGCCATCTGGATGAGCTGACAACCACACTTGAG  
TCCATGACCGAGGATCTGAACCTGGACTCACCCCTGACCCCGAATTGAACGAGATTCTGGATACCTTCCTG  
AACGACGAGTGCCTCTTGCATGCCATGCATATCAGCACAGGACTGTCCATCTTCGACACATCTCTGTTAAGT  
AA

● dHF-VPR: pCAG-dAsCpf1-HF(E174R/N282A/S542R/K548R/D908A)-NLS-3xHA-VPR  
Human codon optimized Acidaminococcus sp. BV3L6 Cpf1 (AsCpf1) is black, mutant site highlighted with red,  
nucleoplasmin NLS with blue, 3xHA with orange, VPR with violet

ATGACACAGTTTCGAGGGCTTTACCAACCTGTATCAGGTGAGCAAGACACTGCGGTTTGAGCTGATCCCACA  
GGGCAAGACCCTGAAGCACATCCAGGAGCAGGGCTTCATCGAGGAGGACAAGGCCCGCAATGATCACTAC  
AAGGAGCTGAAGCCCATCATCGATCGGATCTACAAGACCTATGCCGACCAGTGCCTGCAGCTGGTGCAGCT  
GGATTGGGAGAACCTGAGCGCCGCCATCGACTCCTATAGAAAGGAGAAAACCGAGGAGACAAGGAACGCC  
CTGATCGAGGAGCAGGCCACATATCGCAATGCCATCCACGACTACTTCATCGGCCGGACAGACAACCTGAC  
CGATGCCATCAATAAGAGACACGCCGAGATCTACAAGGGCCTGTTCAAGGCCGAGCTGTTTAATGGCAAGGT  
GCTGAAGCAGCTGGGCACCGTGACCACAACCGAGCACGAGAACGCCCTGCTGCGGAGCTTCGACAAGTTT  
ACAACCTACTTCTCCGGCTTTTATAGA AACAGGAAGAACGTGTTTCAGCGCCGAGGACATTAGCACAGCCATC  
CCACACCCGCATCGTGCAGGACAACCTTCCCAAGTTTAAGGAGAATTGTCACATCTTCACACGCCTGATCACC  
GCCGTGCCAGCCTGCGGGAGCACTTTGAGAACGTGAAGAAGGCCATCGGCATCTTCGTGAGCACCTCCA  
TCGAGGAGGTGTTTTCTTCCCTTTTTATAACCAGCTGCTGACACAGACCCAGATCGACCTGTATAACCAGCT  
GCTGGGAGGAATCTCTCGGGAGGCAGGCACCGAGAAGATCAAGGGCCTGAACGAGGTGCTGGCCCTGGC  
CATCCAGAAGAATGATGAGACAGCCACATCATCGCCTCCCTGCCACACAGATTCATCCCCCTGTTTAAGCA  
GATCCTGTCCGATAGGAACACCCTGTCTTTCATCCTGGAGGAGTTTAAGAGCGACGAGGAAGTATCCAGTC  
CTTCTGCAAGTACAAGACTGCTGAGAAACGAGAACGTGCTGGAGACAGCCGAGGCCCTGTTTAACGAGC  
TGAACAGCATCGACCTGACACACATCTTCATCAGCCACAAGAAGCTGGAGACAATCAGCAGCGCCCTGTGC  
GACCACTGGGATACACTGAGGAATGCCCTGTATGAGCGGAGAATCTCCGAGCTGACAGGCAAGATCACCAA  
GTCTGCCAAGGAGAAGGTGCAGCGCAGCCTGAAGCACGAGGATATCAACCTGCAGGAGATCATCTCTGCC  
GCAGGCAAGGAGCTGAGCGAGGCCCTCAAGCAGAAAACCGAGCGAGATCCTGTCCCACGCACACGCCGCC  
CTGGATCAGCCACTGCCTACAACCCTGAAGAAGCAGGAGGAGAAGGAGATCCTGAAGTCTCAGCTGGACA  
GCCTGCTGGGCCTGTACCACCTGCTGGACTGGTTTGCCGTGGATGAGTCCAACGAGGTGGACCCCGAGTT  
CTCTGCCCGGCTGACCGGCATCAAGCTGGAGATGGAGCCTTCTCTGAGCTTCTACAACAAGGCCAGAAATT  
ATGCCACCAAGAAGCCCTACTCCGTGGAGAAGTTCAAGCTGAACTTTCAGATGCCTACACTGGCCAGAGGC  
TGGGATGTGAACAGAGAGAACAATGGCGCCATCCTGTTTGTGAAGAACGGCCTGTACTATCTGGGCATC  
ATGCCAAAGCAGAAGGGCAGGTATAAGGCCCTGAGCTTCGAGCCACAGAGAAAACCGAGCGAGGGCTTTG  
ATAAGATGTACTATGACTACTTCCCTGATGCCGCCAAGATGATCCCAAAGTGCAGCACCCAGCTGAAGGCCG  
TGACAGCCCACTTTCAGACCCACACAACCCCATCCTGCTGTCCAACAATTTTCATCGAGCCTCTGGAGATCA  
CAAAGGAGATCTACGACCTGAACAATCCTGAGAAGGAGCCAAAGAAGTTTCAGACAGCCTACGCCAAGAAA  
ACCGGCGACCAGAAGGGCTACAGAGAGGCCCTGTGCAAGTGGATCGACTTCACAAGGGATTTTCTGTCCAA  
GTATACCAAGACAACCTCTATCGATCTGTCTAGCCTGCGGCCATCCTCTCAGTATAAGGACCTGGGCGAGTAC  
TATGCCGAGCTGAATCCCCTGCTGTACCACATCAGCTTCCAGAGAATCGCCGAGAAGGAGATCATGGATGCC  
GTGGAGACAGGCAAGCTGTACCTGTTCCAGATCTATAACAAGGACTTTGCCAAGGGCCACCACGGCAAGCC  
TAATCTGCACACACTGTATTGGACCGGCCTGTTTTCTCCAGAGAACCTGGCCAAGACAAGCATCAAGCTGAA  
TGGCCAGGCCGAGCTGTTCTACCGCCCTAAGTCCAGGATGAAGAGGATGGCACACCCGGCTGGGAGAGAAG  
ATGCTGAACAAGAAGCTGAAGGATCAGAAAACCCCAATCCCGACACCCTGTACCAGGAGCTGTACGACTAT  
GTGAATCACAGACTGTCCACGACCTGTCTGATGAGGCCAGGGCCCTGCTGCCCAACGTGATACCAAGGA  
GGTGTCTCACGAGATCATCAAGGATAGGCGCTTTACCAGCGACAAGTTCTTTTTCCACGTGCCTATCACACT  
GAACTATCAGGCCGCCAATTCCCATCTAAGTTCAACCAGAGGGTGAATGCCTACCTGAAGGAGCACCCCG

AGACACCTATCATCGGCATC**GCC**CGGGGCGAGAGAAACCTGATCTATATCACAGTGATCGACTCCACCGGCA  
AGATCCTGGAGCAGCGGAGCCTGAACACCATCCAGCAGTTTGATTACCAGAAGAAGCTGGACAACAGGGAG  
AAGGAGAGGGTGGCAGCAAGGCAGGCCTGGTCTGTGGTGGGCACAATCAAGGATCTGAAGCAGGGCTATC  
TGAGCCAGGTCATCCACGAGATCGTGGACCTGATGATCCACTACCAGGCCGTGGTGGTGTGGAGAACCTG  
AATTCGGCTTTAAGAGCAAGAGGACCGGCATCGCCGAGAAGGCCGTGTACCAGCAGTTCGAGAAGATGCT  
GATCGATAAGCTGAATTGCCTGGTGTGAAGGACTATCCAGCAGAGAAAAGTGGGAGGCCGTGTGAACCCAT  
ACCAGCTGACAGACCAGTTCACCTCCTTTGCCAAGATGGGCACCCAGTCTGGCTTCTGTGTTTACGTGCCT  
GCCCCATATACATCTAAGATCGATCCCCTGACCGGCTTCGTGGACCCCTTCGTGTGAAAACCATCAAGAAT  
CACGAGAGCCGCAAGCACTTCCTGGAGGGCTTCGACTTTCTGCACTACGACGTGAAAACCGGCGACTTCAT  
CCTGCACTTTAAGATGAACAGAAATCTGTCTTCCAGAGGGGCCTGCCCGGCTTTATGCCTGCATGGGATAT  
CGTGTTTCGAGAAGAACGAGACACAGTTTGACGCCAAGGGCACCCCTTTCATCGCCGGCAAGAGAATCGTG  
CCAGTGATCGAGAATCACAGATTCACCGGCAGATACCGGGACCTGTATCCTGCCAACGAGCTGATCGCCCT  
GCTGGAGGAGAAGGGCATCGTGTTCCAGGGATGGCTCCAACATCCTGCCAAAGCTGCTGGAGAATGACGATT  
CTCACGCCATCGACACCATGGTGGCCCTGATCCGCAGCGTGTGCAGATGCGGAACCTCCAATGCCGCCAC  
AGGCGAGGACTATATCAACAGCCCCGTGCGCGATCTGAATGGCGTGTGCTTCGACTCCCGGTTTTCAGAACC  
CAGAGTGGCCATGGACGCCGATGCCAATGGCGCCTACCACATCGCCCTGAAGGGCCAGCTGCTGCTGAA  
TCACCTGAAGGAGAGCAAGGATCTGAAGCTGCAGAACGGCATCTCCAATCAGGACTGGCTGGCCTACATCC  
AGGAGCTGCGCAAC**AAAAGGCCGGCGGCCACGAAAAAGGCCGGCCAGGCCAAAAAGAAAAAGGGATCTA**  
**CCCATACGATGTTCCAGATTACGCTTATCCCTACGACGTGCCTGATTATGCATACCCATACGATGTCCCCGACT**  
**ATGCC**CTCGAGAGCACCGGTGATGCTTTAGACGATTTTGACTTAGATATGCTTGGTTCAGACGCGTTAGACG  
ACTTCGACCTAGACATGTTAGGCTCAGATGCATTGGACGACTTCGATTTAGATATGTTGGGCTCCGATGCCCT  
AGATGACTTTGATCTAGATATGCTAGGAGGAAGCGGAGGAGGAGGTAGCGGACCTAAGAAAAAGAGGAAGG  
TGGCGGCCGCTGGATCCCCTTCAGGGCAGATCAGCAACCAGGCCCTGGCTCTGGCCCTAGCTCCGCTCC  
AGTGTGGCCAGACTATGGTGCCTCTAGTGCTATGGTGCCTCTGGCCAGCCACCTGCTCCAGCCCCTG  
TGCTGACCCAGGACCACCCAGTCACTGAGCGCTCCAGTGCCCAAGTCTACACAGGCCGGCGAGGGGA  
CTCTGAGTGAAGCTCTGCTGCACCTGCAGTTCGACGCTGATGAGGACCTGGGAGCTCTGCTGGGGAACAG  
CACCGATCCCGAGTGTTCACAGATCTGGCCTCCGTGGACAACCTCTGAGTTTCAGCAGCTGCTGAATCAGG  
GCGTGTCCATGTCTCATAGTACAGCCGAACCAATGCTGATGGAGTACCCCGAAGCCATTACCCGGCTGGTGA  
CCGGCAGCCAGCGGCCCCCGACCCGCTCCAACCTCCCTGGGAACCAGCGGCCTGCCTAATGGGCTGT  
CCGGAGATGAAGACTTCTCAAGCATCGCTGATATGGACTTTAGTGCCCTGCTGTACAGATTTCTCTAGTG  
GGTCTGGCAGCGGCAGCGACCTTTCCATCCGCCCCCAAGGGGCCATCTGGATGAGCTGACAACCACACT  
TGAGTCCATGACCGAGGATCTGAACCTGGACTCACCCCTGACCCCGGAATTGAACGAGATTCTGGATACCTT  
CTGAACGACGAGTGCCCTTTGCATGCCATGCATATCAGCACAGGACTGTCCATCTTCGACACATCTCTGTT  
TAAGTAA

● WT-VPR: pCAG-AsCpf1-WT-NLS-3xHA-VPR

Human codon optimized Acidaminococcus sp. BV3L6 Cpf1 (AsCpf1) is black, nucleoplasm NLS with blue, 3xHA with orange, VPR with violet

ATGACACAGTTCGAGGGCTTTACCAACCTGTATCAGGTGAGCAAGACACTGCGGTTTGAGCTGATCCCACA  
GGGCAAGACCCTGAAGCACATCCAGGAGCAGGGCTTCATCGAGGAGGACAAGGCCCGCAATGATCACTAC  
AAGGAGCTGAAGCCCATCATCGATCGGATCTACAAGACCTATGCCGACCAGTGCCTGCAGCTGGTGCAGCT  
GGATTGGGAGAACCTGAGCGCCGCCATCGACTCCTATAGAAAGGAGAAAACCGAGGAGACAAGGAACGCC  
CTGATCGAGGAGCAGGCCACATATCGCAATGCCATCCACGACTACTTCATCGGCCGGACAGACAACCTGAC  
CGATGCCATCAATAAGAGACACGCCGAGATCTACAAGGGCCTGTTCAAGGCCGAGCTGTTTAATGGCAAGGT  
GCTGAAGCAGCTGGGCACCGTGACCACAACCGAGCACGAGAACGCCCTGCTGCGGAGCTTCGACAAGTTT  
ACAACCTACTTCTCCGGCTTTTATGAGAACAGGAAGAACGTGTTTCAGCGCCGAGGATATCAGCACAGCCATC  
CCACACCGCATCGTGCAGGACAACCTCCCAAGTTTAAGGAGAATTGTCACATCTTCACACGCCTGATCACC  
GCCGTGCCAGCCTGCGGGAGCACTTTGAGAACGTGAAGAAGGCCATCGGCATCTTCGTGAGCACCTCCA  
TCGAGGAGGTGTTTTCTTCCCTTTTATAACCAGCTGCTGACACAGACCCAGATCGACCTGTATAACCAGCT  
GCTGGGAGGAATCTCTCGGGAGGCAGGCACCGAGAAGATCAAGGGCCTGAACGAGGTGCTGAATCTGGCC

ATCCAGAAGAATGATGAGACAGCCCACATCATCGCCTCCCTGCCACACAGATTCATCCCCCTGTTTAAGCAG  
ATCCTGTCCGATAGGAACACCCTGTCTTTCATCCTGGAGGAGTTTAAGAGCGACGAGGAAGTGATCCAGTCC  
TTCTGCAAGTACAAGACTGCTGAGAAACGAGAACGTGCTGGAGACAGCCGAGGCCCTGTTTAACGAGCT  
GAACAGCATCGACCTGACACACATCTTCATCAGCCACAAGAAGCTGGAGACAATCAGCAGCGCCCTGTGCG  
ACCACTGGGATACACTGAGGAATGCCCTGTATGAGCGGAGAATCTCCGAGCTGACAGGCAAGATCACCAAG  
TCTGCCAAGGAGAAGGTGCAGCGCAGCCTGAAGCACGAGGATATCAACCTGCAGGAGATCATCTCTGCCGC  
AGGCAAGGAGCTGAGCGAGGCCCTTCAAGCAGAAAACCAGCGAGATCCTGTCCCACGCACACGCCGCCCTG  
GATCAGCCACTGCCTACAACCCTGAAGAAGCAGGAGGAGAAGGAGATCCTGAAGTCTCAGCTGGACAGCCT  
GCTGGGCCTGTACCACCTGCTGGACTGGTTTGCCGTGGATGAGTCCAACGAGGTGGACCCCGAGTTCTCT  
GCCC GGCTGACCGGCATCAAGCTGGAGATGGAGCCTTCTCTGAGCTTCTACAACAAGGCCAGAAATTATGC  
CACCAAGAAGCCCTACTCCGTGGAGAAGTTCAAGCTGAACTTTCAGATGCCTACTGGCCTCTGGCTGGG  
ACGTGAATAAGGAGAAGAACAATGGCGCCATCCTGTTTGTGAAGAACGGCCTGTACTATCTGGGCATCATGC  
CAAAGCAGAAGGGCAGGTATAAGGCCCTGAGCTTCGAGCCCACAGAGAAAACCAGCGAGGGGCTTTGATAAG  
ATGTACTATGACTACTTCCCTGATGCCGCCAAGATGATCCCAAAGTGCAGCACCCAGCTGAAGGCCGTGACA  
GCCCACTTTCAGACCCACACAACCCCATCCTGCTGTCCAACAATTTTCATCGAGCCTCTGGAGATCACAAAG  
GAGATCTACGACCTGAACAATCCTGAGAAGGAGCCAAAGAAGTTTCAGACAGCCTACGCCAAGAAAACCGG  
CGACCAGAAGGGCTACAGAGAGGCCCTGTGCAAGTGGATCGACTTCACAAGGGATTTTCTGTCCAAGTATA  
CCAAGACAACCTCTATCGATCTGTCTAGCCTGCGGCCATCCTCTCAGTATAAGGACCTGGGCGAGTACTATG  
CCGAGCTGAATCCCCTGCTGTACCACATCAGCTTCCAGAGAATCGCCGAGAAGGAGATCATGGATGCCGTG  
GAGACAGGCAAGCTGTACCTGTTCCAGATCTATAACAAGGACTTTGCCAAGGGCCACCACGGCAAGCCTAAT  
CTGCACACACTGTATTGGACCGGCCTGTTTTCTCCAGAGAACCTGGCCAAGACAAGCATCAAGCTGAATGG  
CCAGGCCGAGCTGTTCTACCGCCCTAAGTCCAGGATGAAGAGGATGGCACACCGGCTGGGAGAGAAGATG  
CTGAACAAGAAGCTGAAGGATCAGAAAACCCCAATCCCCGACACCCTGTACCAGGAGCTGTACGACTATGT  
GAATCACAGACTGTCCCACGACCTGTCTGATGAGGCCAGGGCCCTGCTGCCAACGTGATCACCAAGGAG  
GTGTCTCACGAGATCATCAAGGATAGGCGCTTTACCAGCGACAAGTTCTTTTTCCACGTGCCTATCACACTGA  
ACTATCAGGCCGCCAATTCCCCTAAGTTCAACCAGAGGGTGAATGCCTACCTGAAGGAGCACCCCGAG  
ACACCTATCATCGGCATCGATCGGGGCGAGAGAAACCTGATCTATATCACAGTGTACTCCACCGGCAAG  
ATCCTGGAGCAGCGGAGCCTGAACACCATCCAGCAGTTTGATTACCAGAAGAAGCTGGACAACAGGGAGAA  
GGAGAGGGTGGCAGCAAGGCAGGCCCTGGTCTGTGGTGGGCACAATCAAGGATCTGAAGCAGGGCTATCTG  
AGCCAGGTCATCCACGAGATCGTGGACCTGATGATCCACTACCAGGCCGTGGTGGTGGTGGAGAACCTGAA  
TTTTCGGCTTTAAGAGCAAGAGGACCGGCATCGCCGAGAAGGCCGTGTACCAGCAGTTCGAGAAGATGCTGA  
TCGATAAGCTGAATTGCCTGGTGTGAAGGACTATCCAGCAGAGAAAGTGGGAGGCGTGCTGAACCCATAC  
CAGCTGACAGACCAGTTCACCTCCTTTGCCAAGATGGGCACCCAGTCTGGCTTCTGTTTTACGTGCCTGC  
CCATATACATCTAAGATCGATCCCCTGACCGGCTTCGTGGACCCCTTCGTGTGGAAAACCATCAAGAATCAC  
GAGAGCCGCAAGCACTTCCCTGGAGGGCTTCGACTTTCTGCACTACGACGTGAAAACCGGCGACTTCATCCT  
GCACTTTAAGATGAACAGAAATCTGTCTTCCAGAGGGGCCTGCCCGGCTTTATGCCTGCATGGGATATCGT  
GTTTCGAGAAGAACGAGACACAGTTTGACGCCAAGGGCACCCCTTTCATCGCCGCAAGAGAATCGTGCCA  
GTGATCGAGAATCACAGATTCACCGGCAGATACCGGGACCTGTATCCTGCCAACGAGCTGATCGCCCTGCT  
GGAGGAGAAGGGCATCGTGTTCAAGGATGGCTCCAACATCCTGCCAAAGCTGCTGGAGAATGACGATTCTC  
ACGCCATCGACACCATGGTGGCCCTGATCCGCAGCGTGTGCAGATGCGGAACTCCAATGCCGCCACAGG  
CGAGGACTATATCAACAGCCCCGTGCGCGATCTGAATGGCGTGTGCTTCCACTCCCGGTTTTCAGAACCCAG  
AGTGGCCCATGGACGCCGATGCCAATGGCGCCTACCACATCGCCCTGAAGGGCCAGCTGCTGCTGAATCA  
CCTGAAGGAGAGCAAGGATCTGAAGCTGCAGAACGGCATCTCCAATCAGGACTGGCTGGCCTACATCCAGG  
AGCTGCGCAACAAAAGGCCGGCGGCCACGAAAAAGGCCGGCCAGGCAAAAAAGAAAAAGGGATCC**TACCC**  
**ATACGATGTTCCAGATTACGCTTATCCCTACGACGTGCCTGATTATGCATACCCATACGATGTCCCCGACTATG**  
**CC**CTCGAGAGCACCGGTGATGCTTTAGACGATTTTACTTAGATATGCTTGGTTCAGACGCGTTAGACGACT  
TCGACCTAGACATGTTAGGCTCAGATGCATTGGACGACTTCGATTTAGATATGTTGGGCTCCGATGCCCTAGA  
TGACTTTGATCTAGATATGCTAGGAGGAAGCGGAGGAGGAGGTAGCGGACCTAAGAAAAAGAGGAAGGTGG  
CGGCCGCTGGATCCCCTTCAGGGCAGATCAGCAACCAGGCCCTGGCTCTGGCCCCTAGCTCCGCTCCAGT

GCTGGCCCAGACTATGGTGCCTCTAGTGCTATGGTGCCTCTGGCCCAGCCACCTGCTCCAGCCCCTGTGC  
TGACCCCAGGACCACCCCAGTCACTGAGCGCTCCAGTGCCCAAGTCTACACAGGCCGGCGAGGGGACTCT  
GAGTGAAGCTCTGCTGCACCTGCAGTTCGACGCTGATGAGGACCTGGGAGCTCTGCTGGGGAACAGCACC  
GATCCCGGAGTGTTACAGATCTGGCCTCCGTGGACAACCTCTGAGTTTCAGCAGCTGCTGAATCAGGGCGT  
GTCCATGTCTCATAGTACAGCCGAACCAATGCTGATGGAGTACCCCGAAGCCATTACCCGGCTGGTGACCG  
GCAGCCAGCGGCCCCCCGACCCCGCTCCAACCTCCCCTGGGAACCAGCGGCCTGCCTAATGGGCTGTCCG  
GAGATGAAGACTTCTCAAGCATCGCTGATATGGACTTTAGTGCCCTGCTGTACAGATTTCTCTAGTGGGT  
TGCGAGCGGCAGCGACCTTTCCCATCCGCCCCCAAGGGGCCATCTGGATGAGCTGACAACCACACTTGAG  
TCCATGACCGAGGATCTGAACCTGGACTCACCCCTGACCCCGAATTGAACGAGATTCTGGATACCTTCTG  
AACGACGAGTGCCCTTTGCATGCCATGCATATCAGCACAGGACTGTCCATCTTCGACACATCTCTGTTAAGT  
AA

● dRKA-VPR: pCAG-dAsCpf1-RKA(E174R/R951K/R955A/D908A)-NLS-3xHA-VPR

Human codon optimized Acidaminococcus sp. BV3L6 Cpf1 (AsCpf1) is black, mutant site highlighted with red, nucleoplamin NLS with blue, 3xHA with orange, VPR with violet

ATGACACAGTTCGAGGGCTTTACCAACCTGTATCAGGTGAGCAAGACACTGCGGTTTGAGCTGATCCCACA  
GGGCAAGACCCTGAAGCACATCCAGGAGCAGGGCTTCATCGAGGAGGACAAGGCCCGCAATGATCACTAC  
AAGGAGCTGAAGCCCATCATCGATCGGATCTACAAGACCTATGCCGACCAGTGCCTGCAGCTGGTGCAGCT  
GGATTGGGAGAACCTGAGCGCCGCCATCGACTCCTATAGAAAGGAGAAAACCGAGGAGACAAGGAACGCC  
CTGATCGAGGAGCAGGCCACATATCGCAATGCCATCCACGACTACTTCATCGGCCGGACAGACAACCTGAC  
CGATGCCATCAATAAGAGACACGCCGAGATCTACAAGGGCCTGTTCAAGGCCGAGCTGTTTAATGGCAAGGT  
GCTGAAGCAGCTGGGCACCGTGACCACAACCGAGCACGAGAACGCCCTGCTGCGGAGCTTCGACAAGTTT  
ACAACCTACTTCTCCGGCTTTTATAGA AACAGGAAGAACGTGTTTCAGCGCCGAGGACATTAGCACAGCCATC  
CCACACCGCATCGTGACGAGACAACCTTCCCCAAGTTTAAGGAGAATTGTCACATCTTCACACGCCTGATCACC  
GCCGTGCCAGCCTGCGGGAGCACTTTGAGAACGTGAAGAAGGCCATCGGCATCTTCGTGAGCACCTCCA  
TCGAGGAGGTGTTTTCTTCCCTTTTTATAACCAGCTGCTGACACAGACCCAGATCGACCTGTATAACCAGCT  
GCTGGGAGGAATCTCTCGGGAGGCAGGCACCGAGAAGATCAAGGGCCTGAACGAGGTGCTGAATCTGGCC  
ATCCAGAAGAATGATGAGACAGCCCACATCATCGCCTCCCTGCCACACAGATTCATCCCCCTGTTTAAGCAG  
ATCCTGTCCGATAGGAACACCCTGTCTTTCATCCTGGAGGAGTTTAAGAGCGACGAGGAAGTGATCCAGTCC  
TTCTGCAAGTACAAGACACTGCTGAGAAACGAGAACGTGCTGGAGACAGCCGAGGCCCTGTTTAACGAGCT  
GAACAGCATCGACCTGACACACATCTTCATCAGCCACAAGAAGCTGGAGACAATCAGCAGCGCCCTGTGCC  
ACCACTGGGATACTGAGGAATGCCCTGTATGAGCGGAGAATCTCCGAGCTGACAGGCAAGATCACCAAG  
TCTGCCAAGGAGAAGGTGCAGCGCAGCCTGAAGCACGAGGATATCAACCTGCAGGAGATCATCTCTGCCGC  
AGGCAAGGAGCTGAGCGAGGCCTTCAAGCAGAAAACCAGCGAGATCCTGTCCCACGCACACGCCGCCCTG  
GATCAGCCACTGCCTACAACCCTGAAGAAGCAGGAGGAGAAGGAGATCCTGAAGTCTCAGCTGGACAGCCT  
GCTGGGCCTGTACCACCTGCTGGACTGGTTTGCCGTGGATGAGTCCAACGAGGTGGACCCCGAGTTCTCT  
GCCCGGCTGACCGGCATCAAGCTGGAGATGGAGCCTTCTCTGAGCTTCTACAACAAGGCCAGAAATTATGC  
CACCAAGAAGCCCTACTCCGTGGAGAAGTTCAAGCTGAACTTTCAGATGCCTACTGACCTCTGGCTGGG  
ACGTGAATAAGGAGAAGAACAATGGCGCCATCCTGTTTGTGAAGAACGGCCTGTACTATCTGGGCATCATGC  
CAAAGCAGAAGGGCAGGTATAAGGCCCTGAGCTTCGAGCCCACAGAGAAAACCAGCGAGGGCTTTGATAAG  
ATGTACTATGACTACTTCCCTGATGCCGCCAAGATGATCCCAAAGTGCAGCACCCAGCTGAAGGCCGTGACA  
GCCCACTTTCAGACCCACACAACCCCATCCTGCTGTCCAACAATTTTCATCGAGCCTCTGGAGATCACAAG  
GAGATCTACGACCTGAACAATCCTGAGAAGGAGCCAAAGAAGTTTCAGACAGCCTACGCCAAGAAAACCGG  
CGACCAGAAGGGCTACAGAGAGGCCCTGTGCAAGTGGATCGACTTCACAAGGGATTTTCTGTCCAAGTATA  
CCAAGACAACCTCTATCGATCTGTCTAGCCTGCGGCCATCCTCTCAGTATAAGGACCTGGGCGAGTACTATG  
CCGAGCTGAATCCCCTGCTGTACCACATCAGCTTCCAGAGAATCGCCGAGAAGGAGATCATGGATGCCGTG  
GAGACAGGCAAGCTGTACCTGTTCCAGATCTATAACAAGGACTTTGCCAAGGGCCACCACGGCAAGCCTAAT  
CTGCACACACTGTATTGGACCGGCCTGTTTTCTCCAGAGAACCTGGCCAAGACAAGCATCAAGCTGAATGG  
CCAGGCCGAGCTGTTCTACCGCCCTAAGTCCAGGATGAAGAGGATGGCACACCGGCTGGGAGAGAAGATG  
CTGAACAAGAAGCTGAAGGATCAGAAAACCCCAATCCCCGACACCCTGTACCAGGAGCTGTACGACTATGT

GAATCACAGACTGTCCCACGACCTGTCTGATGAGGCCAGGGCCCTGCTGCCCAACGTGATCACCAAGGAG  
GTGTCTCACGAGATCATCAAGGATAGGCGCTTTACCAGCGACAAGTTCTTTTTCCACGTGCCTATCACACTGA  
ACTATCAGGCCGCCAATTCCTCATCTAAGTTCAACCAGAGGGTGAATGCCTACCTGAAGGAGCACCCCGAG  
ACACCTATCATCGGCATCGATCGGGGCGAGAGAAACCTGATCTATATCACAGTGATCGACTCCACCGGCAAG  
ATCCTGGAGCAGCGGAGCCTGAACACCATCCAGCAGTTTGATTACCAGAAGAAGCTGGACAACAGGGAGAA  
GGAG**AAGGTGGCGGCCGCT**CAGGCCTGGTCTGTGGTGGGCACAATCAAGGATCTGAAGCAGGGCTATCTG  
AGCCAGGTCATCCACGAGATCGTGGACCTGATGATCCACTACCAGGCCGTGGTGGTGGTGGAGAACCTGAA  
TTTCGGCTTTAAGAGCAAGAGGACCGGCATCGCCGAGAAGGCCGTGTACCAGCAGTTCGAGAAGATGCTGA  
TCGATAAGCTGAATTGCCTGGTGGTGAAGGACTATCCAGCAGAGAAAGTGGGAGGCGTGCTGAACCCATAC  
CAGCTGACAGACCAGTTCACCTCCTTTGCCAAGATGGGCACCCAGTCTGGCTTCCTGTTTTACGTGCCTGC  
CCCATATACATCTAAGATCGATCCCCTGACCGGCTTCGTGGACCCCTTCGTGTGGAAAACCATCAAGAATCAC  
GAGAGCCGCAAGCACTTCCTGGAGGGCTTCGACTTTCTGCACTACGACGTGAAAACCGGCGACTTCATCCT  
GCACTTTAAGATGAACAGAAATCTGTCTTCCAGAGGGGCTGCCCGGCTTTATGCCTGCATGGGATATCGT  
GTTTCGAGAAGAACGAGACACAGTTTGACGCCAAGGGCACCCCTTTCATCGCCGCAAGAGAATCGTGCCA  
GTGATCGAGAATCACAGATTCACCGGCAGATACCGGGACCTGTATCCTGCCAACGAGCTGATCGCCCTGCT  
GGAGGAGAAGGGCATCGTGTTCAGGGATGGCTCCAACATCCTGCCAAAGCTGCTGGAGAATGACGATTCTC  
ACGCCATCGACACCATGGTGGCCCTGATCCGCAGCGTGCTGCAGATGCGGAACTCCAATGCCGCCACAGG  
CGAGGACTATATCAACAGCCCCGTGCGCGATCTGAATGGCGTGTGCTTCGACTCCCGTTTTAGAACCCAG  
AGTGGCCCATGGACGCCGATGCCAATGGCGCCTACCACATCGCCCTGAAGGGCCAGCTGCTGCTGAATCA  
CCTGAAGGAGAGCAAGGATCTGAAGCTGCAGAACGGCATCTCCAATCAGGACTGGCTGGCCTACATCCAGG  
AGCTGCGCAACA**AAAAGGCCGGCGGCCACGAAAAAGGCCGGCCAGGCCAAAAAGAAAAAG**GGATCC**TACC**  
**CATACGATGTTCCAGATTACGCTTATCCCTACGACGTGCCTGATTATGCATACCCATACGATGTCCCCGACTAT**  
**GCCCTCGAGAGCACCGGTGATGCTTTAGACGATTTTGACTTAGATATGCTTGGTTCAGACGCGTTAGACGAC**  
**TTCGACCTAGACATGTTAGGCTCAGATGCATTGGACGACTTCGATTTAGATATGTTGGGCTCCGATGCCCTAG**  
**ATGACTTTGATCTAGATATGCTAGGAGGAAGCGGAGGAGGAGGTAGCGGACCTAAGAAAAAGAGGAAGGTG**  
**GCGGCCGCTGGATCCCCCTTCAGGGCAGATCAGCAACCAGGCCCTGGCTCTGGCCCCTAGCTCCGCTCCAG**  
**TGCTGGCCCAGACTATGGTGCCCTCTAGTGCTATGGTGCCTCTGGCCCAGCCACCTGCTCCAGCCCCTGTG**  
**CTGACCCCAGGACCACCCAGTCACTGAGCGCTCCAGTGCCCAAGTCTACACAGGCCGGCGAGGGGACTC**  
**TGAGTGAAGCTCTGCTGCACCTGCAGTTCGACGCTGATGAGGACCTGGGAGCTCTGCTGGGGAACAGCAC**  
**CGATCCCGGAGTGTTACAGATCTGGCCTCCGTGGACAACCTCTGAGTTTCAGCAGCTGCTGAATCAGGGCG**  
**TGTCCATGTCTCATAGTACAGCCGAACCAATGCTGATGGAGTACCCCGAAGCCATTACCCGGCTGGTGACCG**  
**GCAGCCAGCGGCCCCCCGACCCCGCTCCAACCTCCCTGGGAACCAGCGGCCTGCCTAATGGGCTGTCCG**  
**GAGATGAAGACTTCTCAAGCATCGCTGATATGGACTTTAGTGCCCTGCTGTACAGATTTCTCTAGTGGGTG**  
**TGGCAGCGGCAGCGACCTTTCCATCCGCCCCCAAGGGGCCATCTGGATGAGCTGACAACCACACTTGAG**  
**TCCATGACCGAGGATCTGAACCTGGACTCACCCCTGACCCCGGAATTGAACGAGATTCTGGATACCTTCCTG**  
**AACGACGAGTGCCCTTTGCATGCCATGCATATCAGCACAGGACTGTCCATCTTCGACACATCTCTGTTAAGT**  
**AA**

● dHF-VPR: pCAG-dAsCpf1-HF(E174R/N282A/S542R/K548R/D908A)-NLS-3xHA-VPR  
Human codon optimized Acidaminococcus sp. BV3L6 Cpf1 (AsCpf1) is black, mutant site highlighted with red,  
nucleoplasmin NLS with blue, 3xHA with orange, VPR with violet  
ATGACACAGTTTCGAGGGCTTTACCAACCTGTATCAGGTGAGCAAGACACTGCGGTTTGAGCTGATCCCACA  
GGGCAAGACCCTGAAGCACATCCAGGAGCAGGGCTTCATCGAGGAGGACAAGGCCCGCAATGATCACTAC  
AAGGAGCTGAAGCCCATCATCGATCGGATCTACAAGACCTATGCCGACCAGTGCCTGCAGCTGGTGCAGCT  
GGATTGGGAGAACCTGAGCGCCGCCATCGACTCCTATAGAAAGGAGAAAACCGAGGAGACAAGGAACGCC  
CTGATCGAGGAGCAGGCCACATATCGCAATGCCATCCACGACTACTTCATCGGCCGGACAGACAACCTGAC  
CGATGCCATCAATAAGAGACACGCCGAGATCTACAAGGGCCTGTTCAAGGCCGAGCTGTTTAATGGCAAGGT  
GCTGAAGCAGCTGGGCACCGTGACCACAACCGAGCACGAGAACGCCCTGCTGCGGAGCTTCGACAAGTTT  
ACAACCTACTTCTCCGGCTTTTAT**AGA**AACAGGAAGAACGTGTTTCAGCGCCGAGGACATTAGCACAGCCATC



CCACACCGCATCGTGCAGGACAACTTCCCCAAGTTTAAGGAGAATTGTCACATCTTCACACGCCTGATCACC  
GCCGTGCCAGCCTGCGGGAGCACTTTGAGAACGTGAAGAAGGCCATCGGCATCTTCGTGAGCACCTCCA  
TCGAGGAGGTGTTTTCCCTTTTATAACCAGCTGCTGACACAGACCCAGATCGACCTGTATAACCAGCT  
GCTGGGAGGAATCTCTCGGGAGGCAGGCACCGAGAAGATCAAGGGCCTGAACGAGGTGCTG**GCC**CTGGC  
CATCCAGAAGAATGATGAGACAGCCCACATCATCGCCTCCCTGCCACACAGATTCATCCCCCTGTTTAAGCA  
GATCCTGTCCGATAGGAACACCCTGTCTTTCATCCTGGAGGAGTTAAGAGCGACGAGGAAGTGATCCAGTC  
CTTCTGCAAGTACAAGACACTGCTGAGAAACGAGAACGTGCTGGAGACAGCCGAGGCCCTGTTTAACGAGC  
TGAACAGCATCGACCTGACACACATCTTCATCAGCCACAAGAAGCTGGAGACAATCAGCAGCGCCCTGTGC  
GACCACTGGGATACACTGAGGAATGCCCTGTATGAGCGGAGAATCTCCGAGCTGACAGGCAAGATCACCAA  
GTCTGCCAAGGAGAAGGTGCAGCGCAGCCTGAAGCACGAGGATATCAACCTGCAGGAGATCATCTCTGCC  
GCAGGCAAGGAGCTGAGCGAGGCCTTCAAGCAGAAAACCAGCGAGATCCTGTCCACGCACACGCCGCC  
CTGGATCAGCCACTGCCTACAACCCTGAAGAAGCAGGAGGAGAAGGAGATCCTGAAGTCTCAGCTGGACA  
GCCTGCTGGGCCTGTACCACCTGCTGGACTGGTTTGCCGTGGATGAGTCCAACGAGGTGGACCCCGAGTT  
CTCTGCCCGGCTGACCGGCATCAAGCTGGAGATGGAGCCTTCTCTGAGCTTCTACAACAAGGCCAGAAATT  
ATGCCACCAAGAAGCCCTACTCCGTGGAGAAGTTCAAGCTGAACTTTTCAGATGCCTACACTGGCC**AGA**GGC  
TGGGATGTGAAC**AGA**GAGAAGAACAATGGCGCCATCCTGTTTGTGAAGAACGGCCTGTACTATCTGGGCATC  
ATGCCAAAGCAGAAGGGCAGGTATAAGGCCCTGAGCTTCGAGCCACAGAGAAAACCAGCGAGGGCTTTG  
ATAAGATGTACTATGACTACTTCCCTGATGCCGCCAAGATGATCCCAAAGTGCAGCACCCAGCTGAAGGCCG  
TGACAGCCCACTTTCAGACCCACACAACCCCATCCTGCTGTCCAACAATTCATCGAGCCTCTGGAGATCA  
CAAAGGAGATCTACGACCTGAACAATCCTGAGAAGGAGCCAAAGAAGTTTCAGACAGCCTACGCCAAGAAA  
ACCGGCGACCAGAAGGGCTACAGAGAGGCCCTGTGCAAGTGGATCGACTTCACAAGGGATTTTCTGTCCAA  
GTATACCAAGACAACCTCTATCGATCTGTCTAGCCTGCGGCCATCCTCTCAGTATAAGGACCTGGGCGAGTAC  
TATGCCGAGCTGAATCCCCTGCTGTACCACATCAGCTTCCAGAGAATCGCCGAGAAGGAGATCATGGATGCC  
GTGGAGACAGGCAAGCTGTACCTGTTCCAGATCTATAACAAGGACTTTGCCAAGGGCCACCACGGCAAGCC  
TAATCTGCACACACTGTATTGGACCGGCCTGTTTTCTCCAGAGAACCTGGCCAAGACAAGCATCAAGCTGAA  
TGGCCAGGCCGAGCTGTTCTACCGCCCTAAGTCCAGGATGAAGAGGATGGCACACCCGGCTGGGAGAGAAG  
ATGCTGAACAAGAAGCTGAAGGATCAGAAAACCCCAATCCCCGACACCCTGTACCAGGAGCTGTACGACTAT  
GTGAATCACAGACTGTCCACGACCTGTCTGATGAGGCCAGGGCCCTGCTGCCCAACGTGATCACCAAGGA  
GGTGTCTCACGAGATCATCAAGGATAGGCGCTTTACCAGCGACAAGTTCTTTTTCCACGTGCCTATCACACT  
GAACTATCAGGCCGCCAATTCCCCTAAGTTCAACCAGAGGGTGAATGCCTACCTGAAGGAGCACCCCG  
AGACACCTATCATCGGCATCGATCGGGGCGAGAGAAACCTGATCTATATCACAGTGATCGACTCCACCGGCA  
AGATCCTGGAGCAGCGGAGCCTGAACACCATCCAGCAGTTTGATTACCAGAAGAAGCTGGACAACAGGGAG  
AAGGAGAGGGTGGCAGCAAGGCAGGCCTGGTCTGTGGTGGGCACAATCAAGGATCTGAAGCAGGGCTATC  
TGAGCCAGGTATCCACGAGATCGTGGACCTGATGATCCACTACCAGGCCGTGGTGGTGTGGAGAACCTG  
AATTTCCGGCTTTAAGAGCAAGAGGACCGGCATCGCCGAGAAGGCCGTGTACCAGCAGTTCGAGAAGATGCT  
GATCGATAAGCTGAATTGCCTGGTGTGAAGGACTATCCAGCAGAGAAAGTGGGAGGCGTGTGAACCCAT  
ACCAGCTGACAGACCAGTTCACCTCCTTTGCCAAGATGGGCACCCAGTCTGGCTTCTGTTTTACGTGCCT  
GCCCCATATACATCTAAGATCGATCCCCTGACCGGCTTCGTGGACCCCTTCGTGTGGAAAACCATCAAGAAT  
CACGAGAGCCGCAAGCACTTCCCTGGAGGGCTTCGACTTTCTGCACTACGACGTGAAAACCGGCGACTTCAT  
CCTGCACTTTAAGATGAACAGAAATCTGTCTTCCAGAGGGGCCTGCCCGGCTTTATGCCTGCATGGGATAT  
CGTGTTCGAGAAGAACGAGACACAGTTTGACGCCAAGGGCACCCCTTTCATCGCCGCAAGAGAATCGTG  
CCAGTGATCGAGAATCACAGATTCACCGGCAGATACCGGGACCTGTATCCTGCCAACGAGCTGATCGCCCT  
GCTGGAGGAGAAGGGCATCGTGTTCAGGGATGGCTCCAACATCCTGCCAAAGCTGCTGGAGAATGACGATT  
CTCACGCCATCGACACCATGGTGGCCCTGATCCGCAGCGTGTGCAGATGCGGAACTCCAATGCCGCCAC  
AGGCGAGGACTATATCAACAGCCCCGTGCGCGATCTGAATGGCGTGTGCTTCGACTCCCGGTTTTCAGAACC  
CAGAGTGGCCCATGGACGCCGATGCCAATGGCGCCTACCACATCGCCCTGAAGGGCCAGCTGCTGCTGAA  
TCACCTGAAGGAGAGCAAGGATCTGAAGCTGCAGAACGGCATCTCCAATCAGGACTGGCTGGCCTACATCC  
AGGAGCTGCGCAAC**AAAAGGCCGGCGGCCACGAAAAAGGCCGGCCAGGCCAAAAAGAAAAAGGGATCC****TA**  
**CCATACGATGTTCCAGATTACGCTTATCCCTACGACGTGCCTGATTATGCATACCCATACGATGTCCCCGACT**

ATGCCCTCGAGAGCACCGGTGATGCTTTAGACGATTTTACTTAGATATGCTTGGTTCAGACGCGTTAGACG  
ACTTCGACCTAGACATGTTAGGCTCAGATGCATTGGACGACTTCGATTTAGATATGTTGGGCTCCGATGCCCT  
AGATGACTTTGATCTAGATATGCTAGGAGGAAGCGGAGGAGGAGGTAGCGGACCTAAGAAAAAGAGGAAGG  
TGGCGGCCGCTGGATCCCCTTCAGGGCAGATCAGCAACCAGGCCCTGGCTCTGGCCCCTAGCTCCGCTCC  
AGTGTGGCCCAGACTATGGTGCCTCTAGTGCTATGGTGCCTCTGGCCCAGCCACCTGCTCCAGCCCCTG  
TGCTGACCCCAGGACCACCCAGTCACTGAGCGCTCCAGTGCCCAAGTCTACACAGGCCGGCGAGGGGA  
CTCTGAGTGAAGCTCTGCTGCACCTGCAGTTCGACGCTGATGAGGACCTGGGAGCTCTGCTGGGGAACAG  
CACCGATCCCGGAGTGTTACAGATCTGGCCTCCGTGGACAACCTCTGAGTTTCAGCAGCTGCTGAATCAGG  
GCGTGTCCATGTCTCATAGTACAGCCGAACCAATGCTGATGGAGTACCCCGAAGCCATTACCCGGCTGGTGA  
CCGGCAGCCAGCGGCCCCCGACCCGCTCCAACCTCCCTGGGAACCAGCGGCCTGCCTAATGGGCTGT  
CCGGAGATGAAGACTTCTCAAGCATCGCTGATATGGACTTTAGTGCCCTGCTGTACAGATTTCTCTAGTG  
GGTCTGGCAGCGGCAGCGACCTTTCCATCCGCCCCCAAGGGGCCATCTGGATGAGCTGACAACCACACT  
TGAGTCCATGACCGAGGATCTGAACCTGGACTACCCCTGACCCCGGAATTGAACGAGATTCTGGATACCT  
CCTGAACGACGAGTGCCTCTTGCATGCCATGCATATCAGCACAGGACTGTCCATCTTCGACACATCTCTGTT  
TAAGTAA

- The amino acid sequences of the AsCpf1 variants used in this study

AsCpf1-A mutant site is K780A

AsCpf1-KA mutant sites are R951K, R955A

AsCpf1-AKA mutant sites are K780A, R951K, R955A

AsCpf1-RKA (AsCpf1-Plus) mutant sites are E174R, R951K, R955A

AsCpf1-KK mutant sites are R951K, R955K

AsCpf1-AKK mutant sites are K780A, R951K, R955K

AsCpf1-RKK mutant sites are E174R, R951K, R955K

enAsCpf1-HF mutant sites are E174R, N282A, S542R, K548R

AsCpf1-ultra mutant sites are M537R, F870L

AsCpf1-UKA mutant sites are M537R, F870L, R951K, R955A

AsCpf1-UKK mutant sites are M537R, F870L, R951K, R955K

AsCpf1-RU mutant sites are E174R, M537R, F870L

AsCpf1-RKAU mutant sites are E174R, M537R, F870L, R951K, R955A

AsCpf1-RKKU mutant sites are E174R, M537R, F870L, R951K, R955K

enAsCpf1 mutant sites are E174R, S542R, K548R

MTQFEGFTNLYQVSKTLRFELIPQGKTLKHIQEQGFIEEDKARNNDHYKELKPIIDRIYKTYADQCLQLVQLDWENL  
SAAIDSYRKEKTEETRNLALIEEQATYRNAIHDFYFIGRTDNLTDAINKRHAEIYKGLFKAELFNGKVLKQLGTVTTTE  
HENALLRSFDKFTTYFSGFY**E(174)**NRKNVFS AEDISTAIPHRIVQDNFPKFKENCHIFTRLITAVPSLREHFENVKK  
AIGIFVSTSIEEVFSFPFYNQLLTQTQIDLYNQLLGGISREAGTEKIKGLNEVL**N(282)**LAIQKNDETAHIIASLPHRFI  
PLFKQILSDRNTLSFILEEFKSDEEVIQSFCKYKTLRNENVLETAEALFNELSIDLTHIFISHKKLETISSALCDHW  
DTLRNALYERRISELTGKITKSAKEKVQRSLKHEDINLQEIIISAAGKELSEAFKQKTSEILSHAHAALDQPLPTTLKK  
QEEKEILKSQLDSSLGLYHLLDWFVAVDESNEVDPEFSARLTGIKLEMESLSFYNKARNYATKKPYSVEKFKLNF  
**Q(M537)**PTLA**S(542)**GWDVNV**K(548)**EKNNGAILFVKNGLYYLGIMPQKQGRYKALSFEPTTEKTSEGFDKMYDYF  
PDAAKMIPKCSTQLKAVTAHFQTHHTPIILLSNNFIEPLEITKEIYDLNNPEKEPKKFQTAYAKKTGDQKGYREALCK  
WIDFTRDFLSKYTKTTSIDLSSLRPSSQYKDLGEYYAELNPLLYHISFQRIAEKEIMDAVETGKLYLFQIYNKDFAK  
GHHGKPNLHTLYWTGLFSPENLAKTSI**K(780)**LNGQAELFYRPKSRMKRMAHRLGEKMLNKKLKDQKTPIPDTLY  
QELYDYVNHRLSHDLSDEARALLPNVITKEVSHEIHKDRRFTSDKF**F(870)**FHVPITLNYQAANSPSKFNQRVNAYL  
KEHPETPIIGIDRGERNLIYITVIDSTGKILEQRSLNTIQQFDYQKKLDNREKE**R(951)**VAAR**(955)**QAWSVVGTIKDL  
KQGYLSQVIHEIVDLMIHYQAVVVLENLNFQFKSKRTGIAEKAVYQQFEKMLIDKLNCLVLKDYPAEKVGVLNPNY  
QLTDQFTSFAKMGTQSGFLFVVPAPYTSKIDPLTGFVDPFVWTKIKNHESRKHFLLEGFDLHYDVKTGDFILHFK  
MNRNLSFQRGLPGFMPAWDIVFEKNETQFDAQGTPFIAGKRIVPIENHRFTGRYRDLYPANELIALLEEKGIVFR

DGSNILPKLLENDSSHAIIDTMVALIRSVLQMRNSNAATGEDYINSPVRDLNGVCFDSRFQNPPEWPMADANGAY  
HIALKGQLLLNHLKESKDLKLQNGISNQDWLAYIQELRN

- The amino acid sequences of the *LbCpf1* variants used in this study:

*LbCpf1*-KA mutant sites are R883K, R887A

*LbCpf1*-RKA (*LbCpf1*-Plus) mutant sites are D156R, R883K, R887A

*LbCpf1*-KK mutant sites are R883K, R887K

*LbCpf1*-RKK mutant sites are D156R, R883K, R887K

*LbCpf1*-ultra mutant sites are N527R, E795L

*LbCpf1*-UKA mutant sites are N527R, E795L, R883K, R887A

*LbCpf1*-UKK mutant sites are N527R, E795L, R883K, R887K

*LbCpf1*-RU mutant sites are D156R, N527R, E795L

*LbCpf1*-RKAU mutant sites are D156R, N527R, E795L, R883K, R887A

*LbCpf1*-RKKU mutant sites are D156R, N527R, E795L, R883K, R887K

MSKLEKFTNCYSLSKTLRFKAIPVGKTQENIDNKRLLEVEDEKRAEDYKGVKLLDRYYLSFINDVLHSIKLKNLNNY  
ISLFRKKTRTEKENKELENLEINLRKEIAKAFKGNIEGYKSLFKKDIETILPEFLDDKDEIALVNSFNFGTTAFTGFFD(  
156)NRENMFSEEAKSTSIAFRCINENLTRYISNMDIFEKVDIAFDKHEVQEIKEILNSDYDVEDFFEGEFFNFVLTQ  
EGIDVYNAIIGGFVTESGEKIKGLNEYINLYNQKTKQKLPKFKPLYKQVLSDRESLSFYGEGYTSDEEVLEVFRNTL  
NKNSEIFSSIKKLEKLFKNFDEYSSAGIFVKNNGPAISTISKDIFGEWNVIRDKWNAEYDDIHLKKAHVTEKYEDDR  
RKSFKKIGSFSLEQLQEYADADLSVVEKLKEIIQKQVDEIYKVGSSSEKLFDAFVLEKSLKKNDAVVAIMKDLLDSV  
KSFENYIKAFFGEGKETNRDESFYGDFVLAYDILLKVDHIYDAIRNYVTQKPYSKDKFKLYFQ(N(527)PQFMGGWD  
KDKETDYRATILRYGSKYLAIMDKKYAKCLQKIDKDDVNGNYEKINYKLLPGPNKMLPKVFFSKKWMAYYNPSE  
DIQKIYKNGTFKKGDMFNLNDCHKLIDFFKDSISRYPKWSNAYDFNFSETEKYKDIAGFYREVVEEQGYKVSFESA  
SKKEVDKLVVEEGKLYMFQIYNKDFSDKSHGTPNLHTMYFKLLFDENNHGQIRLSGGAELFMRRASLKKEELVHP  
ANSPIANKNPDNPKKTTTTLSYDVYKDKRFSEDQYE(795)LHIPIAINKCPKNIFKINTEVRVLLKHDDNPYVIGIDRG  
ERNLLYIVVVDGKGNIVEQYSLNEIINNFNGIRIKTDYHSLLDKKEKER(883)FEAR(887)QNWTSIENIKELKAGYIS  
QVVHKICELVEKYDAVIALEDLNSGFKNSRVKVEKQVYQKFEKMLIDKLNVMVDKKSNPCATGGALKGYQITNKF  
ESFKSMSTQNGFIFYIPAWLTSKIDPSTGFVNLKTKYTSIADSKKFISSFDRIMYVPEEDLFEFALDYKNFSRTDAD  
YIKKWKLYSYGNRIRIFRNPKNVDFWEEVCLTSAYKELFNKYGINYQQGDIRALLCEQSDKAFYSSFMALMSL  
MLQMRNSITGRDVFDFLISPVKNSDGIFYDSRNYEAQENAILPKNADANGAYNIARKVLWAIGQFKKAEDEKLDKV  
KIAISNKEWLEYAQTsvKH
